# Supplementary material for: The LINC complex transmits integrin-dependent tension to the nuclear lamina and represses epidermal differentiation
Source: bioRxiv preprint, doi:10.1101/2020.05.03.075085, version 2 (2020-12-30)
Supplement: Supplementary File 1 [file 075085_file03.xlsx]

## Sheet: Differentials Sun dKO vs WT 
test_id	gene_id	gene	locus	sample_1	sample_2	status	value_1	value_2	log2(fold_change)	test_stat	p_value	q_value	significant
Serpinb2	Serpinb2	Serpinb2	chr1:107511422-107525600	SUNdKO_Low	WT_Low	OK	71.7912	18.6129	-1.9475	-4.96341	5e-05	0.00461875	yes
Steap3	Steap3	Steap3	chr1:120226415-120271082	SUNdKO_Low	WT_Low	OK	4.81045	11.7428	1.28753	2.03536	0.0006	0.0279307	yes
Cdk18	Cdk18	Cdk18	chr1:132113546-132139685	SUNdKO_Low	WT_Low	OK	14.9778	7.48644	-1.00047	-2.02173	0.00205	0.0675187	no
Tnnt2	Tnnt2	Tnnt2	chr1:135836333-135852268	SUNdKO_Low	WT_Low	OK	76.1169	36.5845	-1.05698	-3.2107	5e-05	0.00461875	yes
Kif21b	Kif21b	Kif21b	chr1:136131400-136178014	SUNdKO_Low	WT_Low	OK	4.67524	1.95634	-1.25688	-2.36846	0.0001	0.00748354	yes
Brinp3	Brinp3	Brinp3	chr1:146495665-146902472	SUNdKO_Low	WT_Low	OK	0.293905	5.31824	4.17753	4.46984	5e-05	0.00461875	yes
Fam129a	Fam129a	Fam129a	chr1:151571372-151719347	SUNdKO_Low	WT_Low	OK	4.29629	0.254338	-4.07827	-3.70888	5e-05	0.00461875	yes
Lamc2	Lamc2	Lamc2	chr1:153122755-153186447	SUNdKO_Low	WT_Low	OK	215.796	96.815	-1.15636	-2.3064	0.0002	0.0119434	yes
Glul	Glul	Glul	chr1:153899925-153909723	SUNdKO_Low	WT_Low	OK	0.464785	3.83094	3.04306	2.62977	0.00015	0.00985333	yes
Qsox1	Qsox1	Qsox1	chr1:155778154-155812899	SUNdKO_Low	WT_Low	OK	3.48686	8.65773	1.31206	1.85731	0.00155	0.0558756	no
4930523C07Rik	4930523C07Rik	4930523C07Rik	chr1:160044379-160078586	SUNdKO_Low	WT_Low	OK	0.631665	2.12426	1.74973	2.04492	0.001	0.0414877	yes
Hsd17b7	Hsd17b7	Hsd17b7	chr1:169949536-169969205	SUNdKO_Low	WT_Low	OK	31.233	14.2026	-1.13692	-2.55123	5e-05	0.00461875	yes
Pvrl4	Pvrl4	Pvrl4	chr1:171370172-171388287	SUNdKO_Low	WT_Low	OK	11.9008	5.4527	-1.12602	-2.47433	0.0001	0.00748354	yes
Atf3	Atf3	Atf3	chr1:191170296-191183333	SUNdKO_Low	WT_Low	OK	5.23015	1.45975	-1.84113	-2.17169	0.0009	0.0381419	yes
Igfbp2	Igfbp2	Igfbp2	chr1:72824479-72852471	SUNdKO_Low	WT_Low	OK	167.747	550.965	1.71568	4.4622	5e-05	0.00461875	yes
Tns1	Tns1	Tns1	chr1:73910230-74124449	SUNdKO_Low	WT_Low	OK	0.0590945	1.41119	4.57775	3.78421	0.0001	0.00748354	yes
Fam132b	Fam132b	Fam132b	chr1:91366429-91374217	SUNdKO_Low	WT_Low	OK	8.1958	2.79535	-1.55186	-2.37405	0.0002	0.0119434	yes
Per2	Per2	Per2	chr1:91415981-91459328	SUNdKO_Low	WT_Low	OK	0.54927	2.22243	2.01655	2.18385	0.0003	0.0160507	yes
Ppp1r12a	Ppp1r12a	Ppp1r12a	chr10:108162399-108277575	SUNdKO_Low	WT_Low	OK	17.2384	63.7025	1.88572	3.78804	5e-05	0.00461875	yes
Rab3ip	Rab3ip	Rab3ip	chr10:116905783-116950380	SUNdKO_Low	WT_Low	OK	6.57041	40.4786	2.6231	4.54252	5e-05	0.00461875	yes
4933412E12Rik	4933412E12Rik	4933412E12Rik	chr10:116950561-116963279	SUNdKO_Low	WT_Low	OK	0.254285	7.24538	4.83254	3.48422	0.0004	0.0206533	yes
Cct2	Cct2	Cct2	chr10:117050997-117063814	SUNdKO_Low	WT_Low	OK	322.782	1148.39	1.83098	2.4431	0.0007	0.0306548	yes
Frs2	Frs2	Frs2	chr10:117070126-117148474	SUNdKO_Low	WT_Low	OK	10.8191	41.7023	1.94654	3.46472	5e-05	0.00461875	yes
Yeats4	Yeats4	Yeats4	chr10:117215140-117224507	SUNdKO_Low	WT_Low	OK	24.2295	99.3281	2.03544	3.98585	5e-05	0.00461875	yes
Mdm2	Mdm2	Mdm2	chr10:117688874-117710758	SUNdKO_Low	WT_Low	OK	37.332	163.379	2.12974	4.81148	5e-05	0.00461875	yes
Slc35e3	Slc35e3	Slc35e3	chr10:117733677-117746358	SUNdKO_Low	WT_Low	OK	8.87154	31.3543	1.82141	3.21008	5e-05	0.00461875	yes
Nup107	Nup107	Nup107	chr10:117750642-117792705	SUNdKO_Low	WT_Low	OK	47.8825	175.732	1.87581	3.65289	5e-05	0.00461875	yes
Rap1b	Rap1b	Rap1b	chr10:117814596-117845974	SUNdKO_Low	WT_Low	OK	108.035	410.001	1.92413	2.8483	5e-05	0.00461875	yes
Mdm1	Mdm1	Mdm1	chr10:118141786-118168999	SUNdKO_Low	WT_Low	OK	2.04721	12.6085	2.62267	4.5085	5e-05	0.00461875	yes
Hmga2	Hmga2	Hmga2	chr10:120361274-120476935	SUNdKO_Low	WT_Low	OK	359.004	142.895	-1.32905	-2.66909	5e-05	0.00461875	yes
Srgap1	Srgap1	Srgap1	chr10:121780990-122047315	SUNdKO_Low	WT_Low	OK	1.4916	0.36646	-2.02513	-2.06025	0.0032	0.0900876	no
Lrp1	Lrp1	Lrp1	chr10:127538157-127621148	SUNdKO_Low	WT_Low	OK	2.77787	6.40164	1.20446	2.81911	5e-05	0.00461875	yes
Sgk1	Sgk1	Sgk1	chr10:21882183-21999902	SUNdKO_Low	WT_Low	OK	5.23207	13.9073	1.41038	2.31906	5e-05	0.00461875	yes
H60c	H60c	H60c	chr10:3256207-3267771	SUNdKO_Low	WT_Low	OK	0.809766	7.29087	3.17051	3.43915	0.0002	0.0119434	yes
Plekhg1	Plekhg1	Plekhg1	chr10:3740376-3967302	SUNdKO_Low	WT_Low	OK	11.1513	5.47619	-1.02597	-2.13659	0.0004	0.0206533	yes
Sesn1	Sesn1	Sesn1	chr10:41810573-41908436	SUNdKO_Low	WT_Low	OK	5.63838	14.1674	1.32923	2.61835	5e-05	0.00461875	yes
Prdm1	Prdm1	Prdm1	chr10:44437173-44458748	SUNdKO_Low	WT_Low	OK	2.77816	0.496409	-2.48453	-2.59882	0.00025	0.0140762	yes
Unc5b	Unc5b	Unc5b	chr10:60762594-60831581	SUNdKO_Low	WT_Low	OK	0.236078	2.796	3.56603	4.08422	5e-05	0.00461875	yes
Col6a2	Col6a2	Col6a2	chr10:76595755-76623404	SUNdKO_Low	WT_Low	OK	0.390198	8.60819	4.46343	6.44712	5e-05	0.00461875	yes
Col6a1	Col6a1	Col6a1	chr10:76708791-76726044	SUNdKO_Low	WT_Low	OK	0.650365	6.36808	3.29154	4.7934	5e-05	0.00461875	yes
Pcbp3	Pcbp3	Pcbp3	chr10:76761853-76961947	SUNdKO_Low	WT_Low	OK	9.93119	21.6981	1.12753	2.06599	0.0006	0.0279307	yes
Krt15	Krt15	Krt15	chr11:100131758-100135949	SUNdKO_Low	WT_Low	OK	0.677309	4.79992	2.82513	2.64998	5e-05	0.00461875	yes
Krt19	Krt19	Krt19	chr11:100140810-100145919	SUNdKO_Low	WT_Low	OK	2.45289	9.11169	1.89324	2.32887	0.00275	0.0816985	no
Cnp	Cnp	Cnp	chr11:100574938-100581739	SUNdKO_Low	WT_Low	OK	0.782526	3.58816	2.19703	2.24454	0.0014	0.0515688	no
Map3k14	Map3k14	Map3k14	chr11:103219763-103267401	SUNdKO_Low	WT_Low	OK	1.43788	3.63677	1.33872	1.95066	0.0029	0.0842496	no
Trim47	Trim47	Trim47	chr11:116105749-116110235	SUNdKO_Low	WT_Low	OK	0.429723	3.71899	3.11343	4.5169	0.00015	0.00985333	yes
Timp2	Timp2	Timp2	chr11:118301060-118355411	SUNdKO_Low	WT_Low	OK	40.8868	92.973	1.18518	2.51619	5e-05	0.00461875	yes
Slc16a3	Slc16a3	Slc16a3	chr11:120948483-120959000	SUNdKO_Low	WT_Low	OK	0.100869	3.32549	5.04301	3.60107	0.00015	0.00985333	yes
Zfp750	Zfp750	Zfp750	chr11:121451948-121673151	SUNdKO_Low	WT_Low	OK	16.4174	6.07166	-1.43506	-1.90457	0.0041	0.106312	no
Stc2	Stc2	Stc2	chr11:31359440-31370061	SUNdKO_Low	WT_Low	OK	6.62389	1.0272	-2.68897	-1.96759	0.00185	0.0626774	no
Slit3	Slit3	Slit3	chr11:35121455-35708507	SUNdKO_Low	WT_Low	OK	0.581296	4.81039	3.04881	3.70929	5e-05	0.00461875	yes
Adam19	Adam19	Adam19	chr11:46054501-46147347	SUNdKO_Low	WT_Low	OK	0.125081	0.589473	2.23656	1.72188	0.00335	0.0927644	no
Irgm1	Irgm1	Irgm1	chr11:48865248-48871346	SUNdKO_Low	WT_Low	OK	1.00736	4.81774	2.25777	2.47559	0.0001	0.00748354	yes
Irf1	Irf1	Irf1	chr11:53770013-53778374	SUNdKO_Low	WT_Low	OK	0.30071	8.99391	4.9025	5.02208	5e-05	0.00461875	yes
Igtp	Igtp	Igtp	chr11:58199555-58207592	SUNdKO_Low	WT_Low	OK	0.0720919	1.05943	3.87731	2.52037	0.002	0.0662409	no
Ramp3	Ramp3	Ramp3	chr11:6650147-6677475	SUNdKO_Low	WT_Low	OK	3.36812	11.4837	1.76957	1.95902	0.00145	0.0525914	no
Rnf222	Rnf222	Rnf222	chr11:68888552-68895015	SUNdKO_Low	WT_Low	OK	2.26617	0.396867	-2.51353	-1.89083	0.0007	0.0306548	yes
Rangrf	Rangrf	Rangrf	chr11:68968130-68975185	SUNdKO_Low	WT_Low	OK	1.21815	6.93654	2.50952	2.12286	0.00225	0.0724905	no
Xaf1	Xaf1	Xaf1	chr11:72301628-72313733	SUNdKO_Low	WT_Low	OK	0.24196	1.43378	2.56698	2.09539	0.00125	0.048459	yes
Flot2	Flot2	Flot2	chr11:78037940-78060432	SUNdKO_Low	WT_Low	OK	0.474451	14.6117	4.94472	5.2214	5e-05	0.00461875	yes
Lgals9	Lgals9	Lgals9	chr11:78962978-78984924	SUNdKO_Low	WT_Low	OK	0.855097	7.37577	3.10863	3.22084	5e-05	0.00461875	yes
Mmp28	Mmp28	Mmp28	chr11:83441875-83462961	SUNdKO_Low	WT_Low	OK	1.45192	5.51406	1.92516	2.28936	0.00035	0.0183115	yes
Nr1d1	Nr1d1	Nr1d1	chr11:98767931-98775377	SUNdKO_Low	WT_Low	OK	3.85878	11.1026	1.52468	2.4368	0.00025	0.0140762	yes
Serpina3h	Serpina3h	Serpina3h	chr12:104247895-104254405	SUNdKO_Low	WT_Low	OK	35.035	120.657	1.78404	3.22	5e-05	0.00461875	yes
Serpina3i	Serpina3i	Serpina3i	chr12:104263121-104269365	SUNdKO_Low	WT_Low	OK	9.92631	31.7902	1.67925	2.85454	0.0001	0.00748354	yes
2810029C07Rik	2810029C07Rik	2810029C07Rik	chr12:111572316-111574402	SUNdKO_Low	WT_Low	OK	1.74735	0.482929	-1.85529	-1.65745	0.0041	0.106312	no
Tmem121	Tmem121	Tmem121	chr12:113185902-113189522	SUNdKO_Low	WT_Low	OK	0.176894	3.71491	4.39237	2.95363	0.00405	0.106312	no
Greb1	Greb1	Greb1	chr12:16670614-16800886	SUNdKO_Low	WT_Low	OK	0.096683	0.754856	2.96487	2.93179	5e-05	0.00461875	yes
Pxdn	Pxdn	Pxdn	chr12:29938035-30017658	SUNdKO_Low	WT_Low	OK	0.273859	6.06888	4.46993	3.43653	5e-05	0.00461875	yes
Twist1	Twist1	Twist1	chr12:33957670-33959831	SUNdKO_Low	WT_Low	OK	0.38015	5.41855	3.83327	2.3321	0.00135	0.0508357	no
L3hypdh	L3hypdh	L3hypdh	chr12:72073427-72085313	SUNdKO_Low	WT_Low	OK	0.242456	2.67847	3.46561	2.8966	0.00015	0.00985333	yes
Ttc9	Ttc9	Ttc9	chr12:81631368-81664941	SUNdKO_Low	WT_Low	OK	52.9524	15.9129	-1.7345	-3.56812	5e-05	0.00461875	yes
Acot1	Acot1	Acot1	chr12:84009501-84017669	SUNdKO_Low	WT_Low	OK	0.784215	3.85862	2.29876	1.83539	0.003	0.0858886	no
Rps6kl1	Rps6kl1	Rps6kl1	chr12:85135595-85151264	SUNdKO_Low	WT_Low	OK	0.205547	1.49714	2.86467	2.12955	0.00095	0.0398326	yes
Ift43	Ift43	Ift43	chr12:86082560-86162459	SUNdKO_Low	WT_Low	OK	44.4426	16.7154	-1.41077	-2.63523	0.00015	0.00985333	yes
Fst	Fst	Fst	chr13:114452261-114458951	SUNdKO_Low	WT_Low	OK	110.972	35.0357	-1.6633	-4.48176	5e-05	0.00461875	yes
Gpr137b-ps	Gpr137b-ps	Gpr137b-ps	chr13:12614064-12650395	SUNdKO_Low	WT_Low	OK	102.023	40.3213	-1.33927	-2.91206	5e-05	0.00461875	yes
Prl2c2	Prl2c2	Prl2c2	chr13:12996123-13005330	SUNdKO_Low	WT_Low	OK	319.112	55.7079	-2.51811	-4.53607	5e-05	0.00461875	yes
Prl2c5	Prl2c5	Prl2c5	chr13:13182781-13191840	SUNdKO_Low	WT_Low	OK	44.2705	19.2951	-1.19811	-1.8563	0.0039	0.103626	no
Mboat1	Mboat1	Mboat1	chr13:30136489-30246694	SUNdKO_Low	WT_Low	OK	21.2145	9.88212	-1.10216	-2.07012	0.00065	0.0292228	yes
Tubb2b	Tubb2b	Tubb2b	chr13:34127007-34130354	SUNdKO_Low	WT_Low	OK	66.7212	23.0553	-1.53305	-2.53582	5e-05	0.00461875	yes
Dsp	Dsp	Dsp	chr13:38151293-38198577	SUNdKO_Low	WT_Low	OK	108.637	46.5347	-1.22314	-2.33954	5e-05	0.00461875	yes
Calm4	Calm4	Calm4	chr13:3837756-3838671	SUNdKO_Low	WT_Low	OK	3.82137	0.690692	-2.46797	-2.10922	0.0003	0.0160507	yes
Nedd9	Nedd9	Nedd9	chr13:41309915-41487360	SUNdKO_Low	WT_Low	OK	7.00583	3.43606	-1.0278	-1.78533	0.00175	0.0606804	no
Gadd45g	Gadd45g	Gadd45g	chr13:51846674-51848474	SUNdKO_Low	WT_Low	OK	11.9631	29.173	1.28604	2.02988	0.0022	0.0710732	no
Pitx1	Pitx1	Pitx1	chr13:55825053-55831425	SUNdKO_Low	WT_Low	OK	0.69818	5.4808	2.97272	4.63895	0.0007	0.0306548	yes
Gas1	Gas1	Gas1	chr13:60174404-60177535	SUNdKO_Low	WT_Low	OK	0.115434	1.03642	3.16646	2.33286	0.00265	0.0795269	no
Adarb2	Adarb2	Adarb2	chr13:8202865-8768762	SUNdKO_Low	WT_Low	OK	5.2849	10.9828	1.0553	1.88153	0.00185	0.0626774	no
Vcan	Vcan	Vcan	chr13:89655309-89742512	SUNdKO_Low	WT_Low	OK	5.94191	12.975	1.12674	2.48224	5e-05	0.00461875	yes
Lincenc1	Lincenc1	Lincenc1	chr13:97434969-97497664	SUNdKO_Low	WT_Low	OK	1.44106	7.94716	2.4633	2.96462	5e-05	0.00461875	yes
Foxd1	Foxd1	Foxd1	chr13:98354244-98356705	SUNdKO_Low	WT_Low	OK	0.0585509	2.23928	5.2572	2.98671	0.0029	0.0842496	no
Arhgef3	Arhgef3	Arhgef3	chr14:27143992-27403911	SUNdKO_Low	WT_Low	OK	0.872161	2.50107	1.51988	1.77255	0.00365	0.0987588	no
Sncg	Sncg	Sncg	chr14:34370273-34374669	SUNdKO_Low	WT_Low	OK	2.18799	46.6234	4.41338	4.59114	5e-05	0.00461875	yes
Rpph1	Rpph1	Rpph1	chr14:50807446-50807771	SUNdKO_Low	WT_Low	OK	7.61386	43.5659	2.5165	2.14984	0.003	0.0858886	no
Slc7a8	Slc7a8	Slc7a8	chr14:54722214-54781886	SUNdKO_Low	WT_Low	OK	7.35152	14.8973	1.01894	1.81883	0.0023	0.0733024	no
Psme2	Psme2	Psme2	chr14:55587439-55591101	SUNdKO_Low	WT_Low	OK	23.8488	53.3011	1.16025	2.49032	5e-05	0.00461875	yes
Tgm1	Tgm1	Tgm1	chr14:55700008-55713492	SUNdKO_Low	WT_Low	OK	5.04507	1.36061	-1.89063	-2.05844	0.00025	0.0140762	yes
Fdft1	Fdft1	Fdft1	chr14:63122461-63179578	SUNdKO_Low	WT_Low	OK	62.1976	28.8594	-1.10782	-2.21065	0.00065	0.0292228	yes
Ptk2b	Ptk2b	Ptk2b	chr14:66153256-66281052	SUNdKO_Low	WT_Low	OK	14.7701	6.84627	-1.10929	-2.34709	0.0001	0.00748354	yes
Trim35	Trim35	Trim35	chr14:66295328-66311424	SUNdKO_Low	WT_Low	OK	22.3998	9.01652	-1.31284	-2.43189	5e-05	0.00461875	yes
Sorbs3	Sorbs3	Sorbs3	chr14:70180467-70207671	SUNdKO_Low	WT_Low	OK	0.420976	3.99176	3.24521	2.70895	5e-05	0.00461875	yes
Gm5414	Gm5414	Gm5414	chr15:101624027-101628188	SUNdKO_Low	WT_Low	OK	45.2021	19.6749	-1.20003	-2.35267	0.0002	0.0119434	yes
Krt8	Krt8	Krt8	chr15:101996710-102004342	SUNdKO_Low	WT_Low	OK	9.74505	103.567	3.40976	5.62377	5e-05	0.00461875	yes
Krt18	Krt18	Krt18	chr15:102028215-102032026	SUNdKO_Low	WT_Low	OK	16.4812	33.6543	1.02997	2.09223	0.00285	0.0838269	no
Cdh6	Cdh6	Cdh6	chr15:13034199-13173639	SUNdKO_Low	WT_Low	OK	0.54634	2.27074	2.05529	2.33869	0.0023	0.0733024	no
Zfpm2	Zfpm2	Zfpm2	chr15:40655041-41104592	SUNdKO_Low	WT_Low	OK	0.0680004	0.762373	3.48688	2.6799	0.00105	0.0426639	yes
Dab2	Dab2	Dab2	chr15:6299788-6440709	SUNdKO_Low	WT_Low	OK	0.117931	3.44634	4.86904	4.6624	5e-05	0.00461875	yes
Wisp1	Wisp1	Wisp1	chr15:66891392-66923199	SUNdKO_Low	WT_Low	OK	0.0742736	1.04802	3.81867	3.07528	5e-05	0.00461875	yes
Parp10	Parp10	Parp10	chr15:76232994-76243440	SUNdKO_Low	WT_Low	OK	0.291818	4.52776	3.95566	4.66786	5e-05	0.00461875	yes
Kctd17	Kctd17	Kctd17	chr15:78428563-78439303	SUNdKO_Low	WT_Low	OK	1.95752	7.69221	1.97437	2.834	0.0005	0.0244298	yes
Lgals1	Lgals1	Lgals1	chr15:78926724-78930465	SUNdKO_Low	WT_Low	OK	13.0903	259.933	4.31157	6.29231	5e-05	0.00461875	yes
Sun2	Sun2	Sun2	chr15:79724067-79742536	SUNdKO_Low	WT_Low	OK	3.40232	8.1629	1.26256	2.24498	0.0001	0.00748354	yes
Tef	Tef	Tef	chr15:81802672-81826863	SUNdKO_Low	WT_Low	OK	3.17687	7.73699	1.28417	2.28725	0.0002	0.0119434	yes
Slc1a3	Slc1a3	Slc1a3	chr15:8634123-8710807	SUNdKO_Low	WT_Low	OK	0.0479054	0.750968	3.97049	2.71436	0.0008	0.0345226	yes
Lrrk2	Lrrk2	Lrrk2	chr15:91673223-91816124	SUNdKO_Low	WT_Low	OK	0.905949	2.19829	1.27888	1.82727	0.0019	0.0638227	no
Klhl22	Klhl22	Klhl22	chr16:17759620-17793382	SUNdKO_Low	WT_Low	OK	0.0849771	5.84051	6.10288	4.91408	0.0004	0.0206533	yes
St6gal1	St6gal1	St6gal1	chr16:23224739-23360350	SUNdKO_Low	WT_Low	OK	1.93888	0.526068	-1.8819	-2.09274	0.0016	0.0573285	no
Fam43a	Fam43a	Fam43a	chr16:30599722-30602797	SUNdKO_Low	WT_Low	OK	3.60075	8.82648	1.29354	1.99161	0.0028	0.0829754	no
Parp9	Parp9	Parp9	chr16:35926514-35972621	SUNdKO_Low	WT_Low	OK	0.816776	2.76613	1.75986	1.73696	0.0022	0.0710732	no
Fstl1	Fstl1	Fstl1	chr16:37777054-37836516	SUNdKO_Low	WT_Low	OK	0.0511301	9.51758	7.54028	6.06229	0.00045	0.0224506	yes
Gap43	Gap43	Gap43	chr16:42248560-42340651	SUNdKO_Low	WT_Low	OK	0.201019	18.7949	6.54687	3.97562	0.00015	0.00985333	yes
Cd200	Cd200	Cd200	chr16:45382134-45409053	SUNdKO_Low	WT_Low	OK	0	1.26766	inf	inf	5e-05	0.00461875	yes
Cd47	Cd47	Cd47	chr16:49855653-49911683	SUNdKO_Low	WT_Low	OK	10.3045	21.5299	1.06306	1.89853	0.0007	0.0306548	yes
Tmem45a	Tmem45a	Tmem45a	chr16:56805160-56886163	SUNdKO_Low	WT_Low	OK	0.840628	14.814	4.13935	4.54089	5e-05	0.00461875	yes
Col8a1	Col8a1	Col8a1	chr16:57624255-57754737	SUNdKO_Low	WT_Low	OK	0.0653793	1.10531	4.07947	3.13599	5e-05	0.00461875	yes
Sod1	Sod1	Sod1	chr16:90220741-90226324	SUNdKO_Low	WT_Low	OK	223.381	447.093	1.00107	2.65928	5e-05	0.00461875	yes
Hunk	Hunk	Hunk	chr16:90386396-90499553	SUNdKO_Low	WT_Low	OK	0.0714678	1.29029	4.17426	3.69688	0.0003	0.0160507	yes
Cbr3	Cbr3	Cbr3	chr16:93683218-93690991	SUNdKO_Low	WT_Low	OK	2.24146	7.93736	1.82422	1.69027	0.0026	0.0786251	no
Kcnj15	Kcnj15	Kcnj15	chr16:95257557-95300258	SUNdKO_Low	WT_Low	OK	0.745711	4.18083	2.4871	3.91124	0.0001	0.00748354	yes
Hmga1-rs1	Hmga1-rs1	Hmga1-rs1	chr17:27556573-27563672	SUNdKO_Low	WT_Low	OK	248.822	121.272	-1.03687	-3.04285	5e-05	0.00461875	yes
Tapbp	Tapbp	Tapbp	chr17:33919477-33929290	SUNdKO_Low	WT_Low	OK	4.12578	13.2975	1.68842	3.03791	5e-05	0.00461875	yes
Ly6g6c	Ly6g6c	Ly6g6c	chr17:35067324-35070048	SUNdKO_Low	WT_Low	OK	11.723	2.06398	-2.50584	-2.0813	0.0001	0.00748354	yes
Lbh	Lbh	Lbh	chr17:72918304-72941946	SUNdKO_Low	WT_Low	OK	3.32732	8.47458	1.34878	1.99115	0.00055	0.0263287	yes
Cyp1b1	Cyp1b1	Cyp1b1	chr17:79706952-79715041	SUNdKO_Low	WT_Low	OK	1.44999	5.33121	1.87842	2.69532	0.0012	0.0469828	yes
Dsg2	Dsg2	Dsg2	chr18:20558115-20604526	SUNdKO_Low	WT_Low	OK	0.987377	2.88454	1.54667	2.07372	0.0032	0.0900876	no
Gm6756	Gm6756	Gm6756	chr18:36920304-36922207	SUNdKO_Low	WT_Low	OK	1.38574	7.3791	2.41279	1.95422	0.0026	0.0786251	no
Spink5	Spink5	Spink5	chr18:43963240-44022487	SUNdKO_Low	WT_Low	OK	22.6039	10.1769	-1.15127	-2.81231	5e-05	0.00461875	yes
Eno1b	Eno1b	Eno1b	chr18:47922840-48107980	SUNdKO_Low	WT_Low	OK	20.3951	132.924	2.70431	3.71941	5e-05	0.00461875	yes
Dynap	Dynap	Dynap	chr18:70240428-70244584	SUNdKO_Low	WT_Low	OK	11.9049	3.533	-1.75259	-2.09931	0.0019	0.0638227	no
Pstpip2	Pstpip2	Pstpip2	chr18:77794549-77882879	SUNdKO_Low	WT_Low	OK	1.39992	0.225949	-2.63128	-2.07152	0.002	0.0662409	no
Rab3il1	Rab3il1	Rab3il1	chr19:10018227-10035586	SUNdKO_Low	WT_Low	OK	0.0464364	0.577919	3.63754	2.18821	0.00365	0.0987588	no
Dagla	Dagla	Dagla	chr19:10245264-10304877	SUNdKO_Low	WT_Low	OK	0.0558553	0.626741	3.48811	2.47959	0.0012	0.0469828	yes
Fam111a	Fam111a	Fam111a	chr19:12573524-12596566	SUNdKO_Low	WT_Low	OK	7.13605	14.682	1.04085	1.67851	0.00255	0.0781119	no
Prune2	Prune2	Prune2	chr19:16956117-17223932	SUNdKO_Low	WT_Low	OK	0.588568	1.42495	1.27563	1.82582	0.0013	0.0499065	yes
Acta2	Acta2	Acta2	chr19:34240335-34255373	SUNdKO_Low	WT_Low	OK	0.74276	12.4472	4.06679	4.3528	5e-05	0.00461875	yes
Fas	Fas	Fas	chr19:34290658-34327770	SUNdKO_Low	WT_Low	OK	0.409427	2.39656	2.54929	2.00666	0.00275	0.0816985	no
Lipa	Lipa	Lipa	chr19:34492315-34527474	SUNdKO_Low	WT_Low	OK	1.40752	5.68649	2.01439	2.49367	0.00015	0.00985333	yes
Ifit2	Ifit2	Ifit2	chr19:34550693-34576534	SUNdKO_Low	WT_Low	OK	0.029782	0.607524	4.35043	2.82314	0.00145	0.0525914	no
Loxl4	Loxl4	Loxl4	chr19:42592278-42612806	SUNdKO_Low	WT_Low	OK	3.07799	8.29385	1.43006	2.43672	0.0001	0.00748354	yes
Pax2	Pax2	Pax2	chr19:44757393-44837869	SUNdKO_Low	WT_Low	OK	3.38053	9.54298	1.49719	2.35004	0.00035	0.0183115	yes
Gsto1	Gsto1	Gsto1	chr19:47854988-47864788	SUNdKO_Low	WT_Low	OK	1064.58	417.32	-1.35106	-2.96198	5e-05	0.00461875	yes
Dusp5	Dusp5	Dusp5	chr19:53529317-53541322	SUNdKO_Low	WT_Low	OK	36.9962	15.1034	-1.29251	-2.26228	0.00035	0.0183115	yes
Ehbp1l1	Ehbp1l1	Ehbp1l1	chr19:5707373-5726317	SUNdKO_Low	WT_Low	OK	3.83341	8.84213	1.20577	2.1623	0.0003	0.0160507	yes
Sssca1	Sssca1	Sssca1	chr19:5730305-5731732	SUNdKO_Low	WT_Low	OK	39.078	96.4413	1.3033	2.53481	5e-05	0.00461875	yes
Prr5l	Prr5l	Prr5l	chr2:101714284-101838980	SUNdKO_Low	WT_Low	OK	0.185126	1.0308	2.47719	2.11247	0.00185	0.0626774	no
Abtb2	Abtb2	Abtb2	chr2:103566309-103718423	SUNdKO_Low	WT_Low	OK	7.12335	3.21657	-1.14703	-1.94611	0.00235	0.0742952	no
Kcna4	Kcna4	Kcna4	chr2:107290588-107298504	SUNdKO_Low	WT_Low	OK	0.199583	0.89404	2.16335	1.92468	0.0017	0.0598238	no
Muc15	Muc15	Muc15	chr2:110655200-110950244	SUNdKO_Low	WT_Low	OK	2.63657	0.518505	-2.34623	-2.85591	0.0006	0.0279307	yes
Il15ra	Il15ra	Il15ra	chr2:11705292-11733985	SUNdKO_Low	WT_Low	OK	1.34747	5.30482	1.97705	2.82118	5e-05	0.00461875	yes
Il1a	Il1a	Il1a	chr2:129297369-129309972	SUNdKO_Low	WT_Low	OK	41.5308	9.33838	-2.15294	-3.71514	5e-05	0.00461875	yes
Sirpa	Sirpa	Sirpa	chr2:129592838-129632228	SUNdKO_Low	WT_Low	OK	9.85964	20.9334	1.0862	2.72906	5e-05	0.00461875	yes
Vim	Vim	Vim	chr2:13574310-13582826	SUNdKO_Low	WT_Low	OK	1.06733	201.709	7.56213	9.71119	5e-05	0.00461875	yes
Id1	Id1	Id1	chr2:152736250-152737410	SUNdKO_Low	WT_Low	OK	33.5092	67.7141	1.0149	1.65496	0.00375	0.101233	no
Epb4.1l1	Epb4.1l1	Epb4.1l1	chr2:156420908-156543214	SUNdKO_Low	WT_Low	OK	2.42998	6.32324	1.37972	3.00772	5e-05	0.00461875	yes
Tgm2	Tgm2	Tgm2	chr2:158116404-158146392	SUNdKO_Low	WT_Low	OK	22.1636	63.3322	1.51475	2.63181	5e-05	0.00461875	yes
Slpi	Slpi	Slpi	chr2:164354069-164356507	SUNdKO_Low	WT_Low	OK	73.6893	198.796	1.43176	2.46577	5e-05	0.00461875	yes
Wfdc2	Wfdc2	Wfdc2	chr2:164562715-164568506	SUNdKO_Low	WT_Low	OK	59.6915	17.72	-1.75215	-2.03297	5e-05	0.00461875	yes
Pltp	Pltp	Pltp	chr2:164830729-164857708	SUNdKO_Low	WT_Low	OK	10.7214	43.4203	2.01788	2.61943	0.0002	0.0119434	yes
Nfatc2	Nfatc2	Nfatc2	chr2:168476409-168601657	SUNdKO_Low	WT_Low	OK	1.22574	3.81998	1.63991	2.5078	0.0002	0.0119434	yes
Npepl1	Npepl1	Npepl1	chr2:174110350-174122702	SUNdKO_Low	WT_Low	OK	9.07478	18.3887	1.01889	1.92154	0.00445	0.112429	no
Gm14403	Gm14403	Gm14403	chr2:177498225-177512311	SUNdKO_Low	WT_Low	OK	0.510325	1.93328	1.92156	2.16565	0.0006	0.0279307	yes
Ogfr	Ogfr	Ogfr	chr2:180589406-180595837	SUNdKO_Low	WT_Low	OK	14.0951	32.4285	1.20207	2.98351	0.0001	0.00748354	yes
Gad2	Gad2	Gad2	chr2:22622326-22693877	SUNdKO_Low	WT_Low	OK	0.132957	0.645048	2.27844	2.00142	0.00085	0.0365469	yes
Dpp7	Dpp7	Dpp7	chr2:25352289-25356332	SUNdKO_Low	WT_Low	OK	15.6507	31.6792	1.01731	1.7561	0.00215	0.070032	no
Gm5424	Gm5424	Gm5424	chr2:31470269-31520670	SUNdKO_Low	WT_Low	OK	187.953	93.7188	-1.00396	-1.77932	0.00125	0.048459	yes
Aif1l	Aif1l	Aif1l	chr2:31950302-31973442	SUNdKO_Low	WT_Low	OK	3.30731	9.2473	1.48337	2.17026	0.00045	0.0224506	yes
Ak1	Ak1	Ak1	chr2:32621757-32635058	SUNdKO_Low	WT_Low	OK	11.927	41.5651	1.80114	3.17276	5e-05	0.00461875	yes
Angptl2	Angptl2	Angptl2	chr2:33133418-33371494	SUNdKO_Low	WT_Low	OK	56.5855	27.8521	-1.02265	-2.38634	5e-05	0.00461875	yes
Ptgs1	Ptgs1	Ptgs1	chr2:36230425-36252271	SUNdKO_Low	WT_Low	OK	4.90995	11.7522	1.25915	1.99434	0.00065	0.0292228	yes
Nek6	Nek6	Nek6	chr2:38511696-38587490	SUNdKO_Low	WT_Low	OK	2.20563	5.21047	1.24022	1.72005	0.00385	0.102759	no
Zeb2	Zeb2	Zeb2	chr2:44983511-45114084	SUNdKO_Low	WT_Low	OK	0.0150669	0.407755	4.75824	3.34132	0.0023	0.0733024	no
Nmi	Nmi	Nmi	chr2:51948498-51973208	SUNdKO_Low	WT_Low	OK	0.651741	5.21826	3.0012	2.83125	5e-05	0.00461875	yes
Pla2r1	Pla2r1	Pla2r1	chr2:60417542-60553308	SUNdKO_Low	WT_Low	OK	0.12536	0.824884	2.71811	2.43459	0.0009	0.0381419	yes
Hoxd9	Hoxd9	Hoxd9	chr2:74697762-74700208	SUNdKO_Low	WT_Low	OK	0	1.06067	inf	inf	5e-05	0.00461875	yes
Gyltl1b	Gyltl1b	Gyltl1b	chr2:92365045-92371057	SUNdKO_Low	WT_Low	OK	10.2191	4.36374	-1.22763	-1.97239	0.0023	0.0733024	no
Mapk8ip1	Mapk8ip1	Mapk8ip1	chr2:92383675-92401263	SUNdKO_Low	WT_Low	OK	0.316415	1.74717	2.46513	2.35567	0.00025	0.0140762	yes
Trp53i11	Trp53i11	Trp53i11	chr2:93187583-93201757	SUNdKO_Low	WT_Low	OK	11.2807	4.81714	-1.22761	-2.15235	0.0011	0.0436456	yes
Rhoc	Rhoc	Rhoc	chr3:104789033-104794459	SUNdKO_Low	WT_Low	OK	0.337801	23.1231	6.09702	5.60089	5e-05	0.00461875	yes
Mov10	Mov10	Mov10	chr3:104794833-104818563	SUNdKO_Low	WT_Low	OK	0.688556	2.95478	2.1014	2.59067	5e-05	0.00461875	yes
Csf1	Csf1	Csf1	chr3:107741047-107760469	SUNdKO_Low	WT_Low	OK	0.145075	1.23368	3.0881	3.28933	0.00055	0.0263287	yes
Gstm1	Gstm1	Gstm1	chr3:108012249-108017973	SUNdKO_Low	WT_Low	OK	0.217584	4.13906	4.24966	3.51509	0.00095	0.0398326	yes
Gbp3	Gbp3	Gbp3	chr3:142560051-142573212	SUNdKO_Low	WT_Low	OK	0.0270773	0.660704	4.60885	2.34745	0.00345	0.0942097	no
Ddah1	Ddah1	Ddah1	chr3:145758691-145894277	SUNdKO_Low	WT_Low	OK	0.32129	1.98662	2.62837	2.42284	0.00015	0.00985333	yes
Postn	Postn	Postn	chr3:54361106-54391041	SUNdKO_Low	WT_Low	OK	0.0341921	5.44407	7.31488	5.14178	0.00065	0.0292228	yes
Pkia	Pkia	Pkia	chr3:7366603-7445365	SUNdKO_Low	WT_Low	OK	0.185798	1.14097	2.61846	2.26483	0.002	0.0662409	no
Ctso	Ctso	Ctso	chr3:81932615-81956725	SUNdKO_Low	WT_Low	OK	0.164495	1.08419	2.72051	1.94067	0.003	0.0858886	no
Stmn2	Stmn2	Stmn2	chr3:8509526-8561604	SUNdKO_Low	WT_Low	OK	0.309599	14.5109	5.55059	5.38845	5e-05	0.00461875	yes
Dclk2	Dclk2	Dclk2	chr3:86786149-86920884	SUNdKO_Low	WT_Low	OK	0.12741	0.891868	2.80735	2.08337	0.0015	0.0542385	no
S100a4	S100a4	S100a4	chr3:90603769-90606045	SUNdKO_Low	WT_Low	OK	6.34459	37.6115	2.56757	2.79492	0.00055	0.0263287	yes
Sprr2d	Sprr2d	Sprr2d	chr3:92339139-92340873	SUNdKO_Low	WT_Low	OK	29.6217	8.14921	-1.86192	-2.33037	0.0002	0.0119434	yes
Sprr2h	Sprr2h	Sprr2h	chr3:92385684-92387319	SUNdKO_Low	WT_Low	OK	73.2135	20.8877	-1.80946	-2.89597	5e-05	0.00461875	yes
Sprr2i	Sprr2i	Sprr2i	chr3:92407990-92409271	SUNdKO_Low	WT_Low	OK	9.45493	2.45727	-1.94401	-2.45112	0.00305	0.0868993	no
Sprr2k	Sprr2k	Sprr2k	chr3:92432581-92433927	SUNdKO_Low	WT_Low	OK	52.8483	20.4852	-1.36727	-2.03461	0.00135	0.0508357	no
Sprr1b	Sprr1b	Sprr1b	chr3:92436808-92438779	SUNdKO_Low	WT_Low	OK	377.211	115.356	-1.70929	-3.56617	5e-05	0.00461875	yes
Sprr1a	Sprr1a	Sprr1a	chr3:92483953-92485881	SUNdKO_Low	WT_Low	OK	128.513	14.757	-3.12244	-5.68996	5e-05	0.00461875	yes
Ivl	Ivl	Ivl	chr3:92570899-92573735	SUNdKO_Low	WT_Low	OK	20.8276	8.77901	-1.24637	-2.47934	0.0001	0.00748354	yes
Lce1f	Lce1f	Lce1f	chr3:92718695-92720350	SUNdKO_Low	WT_Low	OK	13.966	37.9459	1.44203	1.34851	0.00295	0.0852831	no
Crct1	Crct1	Crct1	chr3:93014204-93015686	SUNdKO_Low	WT_Low	OK	6.95523	0.637261	-3.44814	-2.31811	0.00395	0.104252	no
Adamtsl4	Adamtsl4	Adamtsl4	chr3:95676200-95687917	SUNdKO_Low	WT_Low	OK	0.840933	2.65211	1.65708	1.90012	0.00365	0.0987588	no
Ecm1	Ecm1	Ecm1	chr3:95734147-95739569	SUNdKO_Low	WT_Low	OK	34.3843	108.191	1.65376	4.06127	5e-05	0.00461875	yes
Hist2h2bb	Hist2h2bb	Hist2h2bb	chr3:96269699-96270192	SUNdKO_Low	WT_Low	OK	1.43697	8.02277	2.48108	2.22463	0.0011	0.0436456	yes
Txnip	Txnip	Txnip	chr3:96555767-96566801	SUNdKO_Low	WT_Low	OK	12.9484	36.7707	1.50578	3.76814	5e-05	0.00461875	yes
Tbx15	Tbx15	Tbx15	chr3:99253759-99354260	SUNdKO_Low	WT_Low	OK	0.0397557	0.635671	3.99905	2.56232	0.0029	0.0842496	no
Pou3f1	Pou3f1	Pou3f1	chr4:124657645-124660655	SUNdKO_Low	WT_Low	OK	1.17636	4.19089	1.83292	1.79287	0.0042	0.107724	no
Col16a1	Col16a1	Col16a1	chr4:130047839-130099277	SUNdKO_Low	WT_Low	OK	0.175001	0.927922	2.40664	2.60512	0.0003	0.0160507	yes
Grhl3	Grhl3	Grhl3	chr4:135541887-135573620	SUNdKO_Low	WT_Low	OK	8.33871	2.74356	-1.60377	-2.50828	5e-05	0.00461875	yes
Id3	Id3	Id3	chr4:136143821-136145392	SUNdKO_Low	WT_Low	OK	30.7444	83.945	1.44912	2.81201	5e-05	0.00461875	yes
Sh2d5	Sh2d5	Sh2d5	chr4:138250410-138260968	SUNdKO_Low	WT_Low	OK	50.1302	23.798	-1.07484	-2.61498	5e-05	0.00461875	yes
Padi3	Padi3	Padi3	chr4:140785368-140810648	SUNdKO_Low	WT_Low	OK	5.06854	12.5084	1.30325	2.09464	0.00075	0.0326029	yes
Fblim1	Fblim1	Fblim1	chr4:141576061-141606052	SUNdKO_Low	WT_Low	OK	13.9166	5.6921	-1.28978	-2.27911	0.00015	0.00985333	yes
Trp73	Trp73	Trp73	chr4:154056248-154140208	SUNdKO_Low	WT_Low	OK	1.73279	3.97088	1.19636	2.04231	0.00345	0.0942097	no
Megf6	Megf6	Megf6	chr4:154170712-154275721	SUNdKO_Low	WT_Low	OK	3.95729	9.00477	1.18618	2.39469	0.0001	0.00748354	yes
Isg15	Isg15	Isg15	chr4:156199423-156200818	SUNdKO_Low	WT_Low	OK	0	0.946418	inf	inf	5e-05	0.00461875	yes
Unc13b	Unc13b	Unc13b	chr4:43058983-43264887	SUNdKO_Low	WT_Low	OK	4.28564	1.6701	-1.35958	-2.22714	0.0002	0.0119434	yes
Rmrp	Rmrp	Rmrp	chr4:43492784-43493059	SUNdKO_Low	WT_Low	OK	17.9779	158.92	3.144	4.78905	0.0002	0.0119434	yes
Glipr2	Glipr2	Glipr2	chr4:43957701-43979118	SUNdKO_Low	WT_Low	OK	0.124316	1.04124	3.06621	2.14252	0.00135	0.0508357	no
Akap2	Akap2	Akap2	chr4:57568247-57896984	SUNdKO_Low	WT_Low	OK	1.71904	5.16059	1.58593	3.00539	5e-05	0.00461875	yes
Orm1	Orm1	Orm1	chr4:63344565-63348162	SUNdKO_Low	WT_Low	OK	20.9972	46.2966	1.14071	1.91708	0.0014	0.0515688	no
Tnc	Tnc	Tnc	chr4:63959784-64047015	SUNdKO_Low	WT_Low	OK	3.55836	1.40938	-1.33615	-2.19737	0.00025	0.0140762	yes
Plac8	Plac8	Plac8	chr5:100553732-100572205	SUNdKO_Low	WT_Low	OK	32.2806	360.09	3.47962	4.85536	5e-05	0.00461875	yes
Tgfbr3	Tgfbr3	Tgfbr3	chr5:107106569-107289595	SUNdKO_Low	WT_Low	OK	0.960869	5.10328	2.40901	3.26327	5e-05	0.00461875	yes
Mn1	Mn1	Mn1	chr5:111418165-111457025	SUNdKO_Low	WT_Low	OK	0.0570648	0.841552	3.88238	2.30698	0.0033	0.0918099	no
Tpst2	Tpst2	Tpst2	chr5:112276706-112315356	SUNdKO_Low	WT_Low	OK	28.0607	59.5936	1.08661	2.7342	0.00015	0.00985333	yes
Trpv4	Trpv4	Trpv4	chr5:114622153-114658421	SUNdKO_Low	WT_Low	OK	3.62778	10.7282	1.56425	2.80645	5e-05	0.00461875	yes
Aldh2	Aldh2	Aldh2	chr5:121566026-121593824	SUNdKO_Low	WT_Low	OK	0.930861	14.4818	3.95953	4.67878	5e-05	0.00461875	yes
Auts2	Auts2	Auts2	chr5:131437681-132542343	SUNdKO_Low	WT_Low	OK	5.33131	11.1867	1.06922	2.52724	0.0001	0.00748354	yes
Clip2	Clip2	Clip2	chr5:134489382-134552434	SUNdKO_Low	WT_Low	OK	2.63603	5.43884	1.04493	1.94902	0.00235	0.0742952	no
Micall2	Micall2	Micall2	chr5:139706692-139736333	SUNdKO_Low	WT_Low	OK	9.58222	4.50456	-1.08897	-2.19494	0.00175	0.0606804	no
Chst12	Chst12	Chst12	chr5:140505608-140525238	SUNdKO_Low	WT_Low	OK	3.19779	10.2907	1.68619	2.46504	0.00095	0.0398326	yes
Lfng	Lfng	Lfng	chr5:140607340-140615545	SUNdKO_Low	WT_Low	OK	17.8676	37.4184	1.0664	2.46879	0.0001	0.00748354	yes
Stard13	Stard13	Stard13	chr5:151037514-151190193	SUNdKO_Low	WT_Low	OK	2.21624	5.19782	1.22979	2.12174	0.0006	0.0279307	yes
Spon2	Spon2	Spon2	chr5:33213517-33218238	SUNdKO_Low	WT_Low	OK	14.8021	6.36422	-1.21775	-1.84329	0.001	0.0414877	yes
Hmx1	Hmx1	Hmx1	chr5:35389116-35392872	SUNdKO_Low	WT_Low	OK	1.22827	13.9273	3.50322	2.41703	0.0038	0.101885	no
Ppp2r2c	Ppp2r2c	Ppp2r2c	chr5:36868569-36955078	SUNdKO_Low	WT_Low	OK	2.81846	11.8204	2.06829	3.37296	5e-05	0.00461875	yes
Bst1	Bst1	Bst1	chr5:43818892-43843468	SUNdKO_Low	WT_Low	OK	16.6001	64.6097	1.96056	3.31325	5e-05	0.00461875	yes
Fgfbp1	Fgfbp1	Fgfbp1	chr5:43978857-43981799	SUNdKO_Low	WT_Low	OK	206.603	64.8267	-1.6722	-4.01872	5e-05	0.00461875	yes
Fzd1	Fzd1	Fzd1	chr5:4753838-4758216	SUNdKO_Low	WT_Low	OK	1.3618	4.88611	1.84317	2.51312	0.0003	0.0160507	yes
Adgra2	Adgra2	Adgra2	chr5:49959950-50058996	SUNdKO_Low	WT_Low	OK	2.36053	7.85791	1.73503	2.78522	5e-05	0.00461875	yes
Sel1l3	Sel1l3	Sel1l3	chr5:53107082-53213452	SUNdKO_Low	WT_Low	OK	1.4582	4.62124	1.66409	2.09806	0.00115	0.0454769	yes
Tmprss11e	Tmprss11e	Tmprss11e	chr5:86705185-86745807	SUNdKO_Low	WT_Low	OK	7.62252	3.69867	-1.04326	-2.03527	0.0041	0.106312	no
Fras1	Fras1	Fras1	chr5:96373954-96784728	SUNdKO_Low	WT_Low	OK	0.237009	0.962157	2.02133	2.33414	0.00015	0.00985333	yes
Pdzrn3	Pdzrn3	Pdzrn3	chr6:101149606-101377897	SUNdKO_Low	WT_Low	OK	1.92281	5.07726	1.40084	2.15362	0.0014	0.0515688	no
Plxnd1	Plxnd1	Plxnd1	chr6:115954810-115995005	SUNdKO_Low	WT_Low	OK	0.27826	1.3258	2.25236	2.88077	0.00105	0.0426639	yes
Ntf3	Ntf3	Ntf3	chr6:126101411-126166744	SUNdKO_Low	WT_Low	OK	0.094338	0.870924	3.20664	2.25454	0.00135	0.0508357	no
Hebp1	Hebp1	Hebp1	chr6:135137518-135168215	SUNdKO_Low	WT_Low	OK	0.310148	1.82704	2.55848	1.92904	0.0026	0.0786251	no
Arhgdib	Arhgdib	Arhgdib	chr6:136923660-136941899	SUNdKO_Low	WT_Low	OK	81.0546	34.5498	-1.23022	-3.34046	5e-05	0.00461875	yes
Bcat1	Bcat1	Bcat1	chr6:144993834-145076157	SUNdKO_Low	WT_Low	OK	3.6342	1.30793	-1.47436	-2.21552	0.00045	0.0224506	yes
Ptprz1	Ptprz1	Ptprz1	chr6:22875501-23052916	SUNdKO_Low	WT_Low	OK	4.75621	2.13219	-1.15747	-1.99673	0.00105	0.0426639	yes
Flnc	Flnc	Flnc	chr6:29433152-29461888	SUNdKO_Low	WT_Low	OK	0.836662	2.04596	1.29006	1.99964	0.00255	0.0781119	no
Cpa4	Cpa4	Cpa4	chr6:30568375-30591747	SUNdKO_Low	WT_Low	OK	94.7434	44.552	-1.08854	-2.37547	5e-05	0.00461875	yes
Podxl	Podxl	Podxl	chr6:31519492-31563937	SUNdKO_Low	WT_Low	OK	6.70715	3.29915	-1.0236	-1.72315	0.0025	0.0771802	no
Parp12	Parp12	Parp12	chr6:39086411-39118349	SUNdKO_Low	WT_Low	OK	4.25437	9.7826	1.20127	1.95996	0.00055	0.0263287	yes
Dennd2a	Dennd2a	Dennd2a	chr6:39462377-39557834	SUNdKO_Low	WT_Low	OK	0.227843	2.73874	3.5874	4.06042	5e-05	0.00461875	yes
Tcaf2	Tcaf2	Tcaf2	chr6:42623042-42645041	SUNdKO_Low	WT_Low	OK	0.078973	0.571995	2.85657	2.12971	0.0003	0.0160507	yes
Tmem176b	Tmem176b	Tmem176b	chr6:48833810-48841374	SUNdKO_Low	WT_Low	OK	0.929116	9.64643	3.37606	3.35605	5e-05	0.00461875	yes
Tmem176a	Tmem176a	Tmem176a	chr6:48841482-48845364	SUNdKO_Low	WT_Low	OK	0.731474	7.53738	3.36519	2.89081	0.0001	0.00748354	yes
Igf2bp3	Igf2bp3	Igf2bp3	chr6:49085217-49214954	SUNdKO_Low	WT_Low	OK	16.9617	6.95349	-1.28647	-2.62768	0.0001	0.00748354	yes
Fam188b	Fam188b	Fam188b	chr6:55203382-55320222	SUNdKO_Low	WT_Low	OK	0.102814	0.488011	2.24688	1.95181	0.00325	0.0906321	no
Hpgds	Hpgds	Hpgds	chr6:65117292-65144730	SUNdKO_Low	WT_Low	OK	5.48879	1.98399	-1.46808	-2.20822	0.0005	0.0244298	yes
Atoh8	Atoh8	Atoh8	chr6:72206176-72235577	SUNdKO_Low	WT_Low	OK	0.123828	2.64432	4.41648	2.4374	0.0006	0.0279307	yes
Asprv1	Asprv1	Asprv1	chr6:86628173-86629704	SUNdKO_Low	WT_Low	OK	48.1789	6.37596	-2.91769	-4.56166	5e-05	0.00461875	yes
Antxr1	Antxr1	Antxr1	chr6:87133852-87335775	SUNdKO_Low	WT_Low	OK	0.882767	6.67813	2.91934	3.78478	5e-05	0.00461875	yes
Fbln2	Fbln2	Fbln2	chr6:91212763-91272540	SUNdKO_Low	WT_Low	OK	50.8792	110.801	1.12282	3.15837	5e-05	0.00461875	yes
Ucp2	Ucp2	Ucp2	chr7:100493357-100499629	SUNdKO_Low	WT_Low	OK	21.8711	85.2426	1.96255	2.48205	5e-05	0.00461875	yes
Trim12c	Trim12c	Trim12c	chr7:104338753-104353358	SUNdKO_Low	WT_Low	OK	0.419861	2.19317	2.38503	2.6514	5e-05	0.00461875	yes
St5	St5	St5	chr7:109523910-109617147	SUNdKO_Low	WT_Low	OK	0.984622	3.53678	1.84479	2.42861	0.0002	0.0119434	yes
Galnt18	Galnt18	Galnt18	chr7:111471660-111779977	SUNdKO_Low	WT_Low	OK	7.34991	15.2692	1.05482	2.03525	0.0009	0.0381419	yes
Nupr1	Nupr1	Nupr1	chr7:126623245-126625470	SUNdKO_Low	WT_Low	OK	32.2222	7.98968	-2.01184	-3.11454	5e-05	0.00461875	yes
Tgfb1i1	Tgfb1i1	Tgfb1i1	chr7:128246811-128255699	SUNdKO_Low	WT_Low	OK	0.0463998	0.614259	3.72665	2.58398	0.003	0.0858886	no
Cdkn1c	Cdkn1c	Cdkn1c	chr7:143458338-143461050	SUNdKO_Low	WT_Low	OK	0.0739184	6.11764	6.3709	4.17934	0.002	0.0662409	no
Kcnn4	Kcnn4	Kcnn4	chr7:24370262-24385212	SUNdKO_Low	WT_Low	OK	35.4882	16.424	-1.11154	-2.47967	0.0001	0.00748354	yes
Fbxo17	Fbxo17	Fbxo17	chr7:28716789-28738140	SUNdKO_Low	WT_Low	OK	0.231428	1.99932	3.11087	2.83625	0.0002	0.0119434	yes
Pop4	Pop4	Pop4	chr7:38262819-38271348	SUNdKO_Low	WT_Low	OK	27.8792	11.2618	-1.30775	-2.25332	0.00015	0.00985333	yes
Klk10	Klk10	Klk10	chr7:43781053-43785410	SUNdKO_Low	WT_Low	OK	109.36	53.3555	-1.03537	-2.35323	0.0002	0.0119434	yes
Klk8	Klk8	Klk8	chr7:43797576-43803822	SUNdKO_Low	WT_Low	OK	115.53	43.405	-1.41234	-3.51377	5e-05	0.00461875	yes
Cpt1c	Cpt1c	Cpt1c	chr7:44959371-44974851	SUNdKO_Low	WT_Low	OK	0.0579485	2.74803	5.56748	5.20275	0.00175	0.0606804	no
Emp3	Emp3	Emp3	chr7:45918022-45921426	SUNdKO_Low	WT_Low	OK	36.9194	74.0982	1.00506	2.0015	0.00105	0.0426639	yes
Rgma	Rgma	Rgma	chr7:73310379-73419899	SUNdKO_Low	WT_Low	OK	0.450578	1.88696	2.06622	2.30556	0.0017	0.0598238	no
Slco3a1	Slco3a1	Slco3a1	chr7:74275417-74554780	SUNdKO_Low	WT_Low	OK	3.0818	6.53962	1.08543	1.92731	0.0014	0.0515688	no
Idh2	Idh2	Idh2	chr7:80094846-80115350	SUNdKO_Low	WT_Low	OK	19.4296	39.7461	1.03256	2.19214	0.0005	0.0244298	yes
Mex3b	Mex3b	Mex3b	chr7:82867332-82871576	SUNdKO_Low	WT_Low	OK	7.89512	2.86311	-1.46338	-2.03929	0.0008	0.0345226	yes
Myo7a	Myo7a	Myo7a	chr7:98051053-98119493	SUNdKO_Low	WT_Low	OK	0.797376	0.185044	-2.10739	-1.80963	0.00185	0.0626774	no
Cmtm3	Cmtm3	Cmtm3	chr8:104340593-104347672	SUNdKO_Low	WT_Low	OK	26.3925	10.1129	-1.38393	-2.25689	5e-05	0.00461875	yes
Cdh1	Cdh1	Cdh1	chr8:106603367-106670246	SUNdKO_Low	WT_Low	OK	84.7812	39.6593	-1.09609	-2.56874	5e-05	0.00461875	yes
Il34	Il34	Il34	chr8:110741828-110805924	SUNdKO_Low	WT_Low	OK	1.55274	0.253818	-2.61295	-2.2724	0.00135	0.0508357	no
Maf	Maf	Maf	chr8:115703252-115706894	SUNdKO_Low	WT_Low	OK	4.061	9.03975	1.15445	2.11095	0.0009	0.0381419	yes
Mvd	Mvd	Mvd	chr8:122433595-122443422	SUNdKO_Low	WT_Low	OK	53.4786	24.4266	-1.13051	-2.27162	0.0001	0.00748354	yes
Gm22109	Gm22109	Gm22109	chr8:123538783-123538904	SUNdKO_Low	WT_Low	OK	1370.38	5380.26	1.9731	2.51961	0.0001	0.00748354	yes
Gm22291	Gm22291	Gm22291	chr8:123543870-123545696	SUNdKO_Low	WT_Low	OK	1370.38	5380.26	1.9731	2.51961	0.0001	0.00748354	yes
Gm25018	Gm25018	Gm25018	chr8:123547262-123566087	SUNdKO_Low	WT_Low	OK	1370.38	5380.26	1.9731	2.51961	0.0001	0.00748354	yes
Gm25212	Gm25212	Gm25212	chr8:123550664-123550785	SUNdKO_Low	WT_Low	OK	1370.38	5380.26	1.9731	2.51961	0.0001	0.00748354	yes
Gm23284	Gm23284	Gm23284	chr8:123560885-123561006	SUNdKO_Low	WT_Low	OK	1370.38	5380.26	1.9731	2.51961	0.0001	0.00748354	yes
Rhou	Rhou	Rhou	chr8:123653928-123663880	SUNdKO_Low	WT_Low	OK	11.9129	5.78235	-1.0428	-1.95653	0.0011	0.0436456	yes
Defb14	Defb14	Defb14	chr8:19194327-19195309	SUNdKO_Low	WT_Low	OK	382.195	95.1751	-2.00565	-3.46321	5e-05	0.00461875	yes
Plat	Plat	Plat	chr8:22757721-22782848	SUNdKO_Low	WT_Low	OK	5.68665	15.8696	1.48062	2.19878	0.00065	0.0292228	yes
Sfrp1	Sfrp1	Sfrp1	chr8:23411501-23449632	SUNdKO_Low	WT_Low	OK	0.0783254	0.834127	3.41272	2.92431	0.00025	0.0140762	yes
Mfhas1	Mfhas1	Mfhas1	chr8:35582502-35679449	SUNdKO_Low	WT_Low	OK	18.7065	5.73713	-1.70514	-3.21719	5e-05	0.00461875	yes
Camsap3	Camsap3	Camsap3	chr8:3587449-3609075	SUNdKO_Low	WT_Low	OK	15.3955	6.31182	-1.28638	-2.81506	5e-05	0.00461875	yes
Pdgfrl	Pdgfrl	Pdgfrl	chr8:40926232-40990770	SUNdKO_Low	WT_Low	OK	0.108601	2.56211	4.56023	3.18503	0.00185	0.0626774	no
Fam149a	Fam149a	Fam149a	chr8:45336714-45382291	SUNdKO_Low	WT_Low	OK	0.234406	1.1977	2.35319	1.94541	0.00395	0.104252	no
Vegfc	Vegfc	Vegfc	chr8:54077531-54186454	SUNdKO_Low	WT_Low	OK	0.0882753	0.850716	3.2686	2.31782	0.004	0.105336	no
Npy1r	Npy1r	Npy1r	chr8:66697421-66706798	SUNdKO_Low	WT_Low	OK	0.480381	2.74048	2.51218	2.48356	0.00025	0.0140762	yes
Lpl	Lpl	Lpl	chr8:68880554-68906932	SUNdKO_Low	WT_Low	OK	1.3906	0.260221	-2.4179	-2.44424	0.0002	0.0119434	yes
Sall1	Sall1	Sall1	chr8:89027242-89044162	SUNdKO_Low	WT_Low	OK	1.7403	0.127108	-3.77521	-2.42575	0.0007	0.0306548	yes
Mt2	Mt2	Mt2	chr8:94172617-94173567	SUNdKO_Low	WT_Low	OK	132.644	305.255	1.20245	2.48283	0.0001	0.00748354	yes
Ndrg4	Ndrg4	Ndrg4	chr8:95703036-95715119	SUNdKO_Low	WT_Low	OK	6.91625	18.9621	1.45506	2.72205	5e-05	0.00461875	yes
Rab6b	Rab6b	Rab6b	chr9:103112073-103185270	SUNdKO_Low	WT_Low	OK	2.30721	0.614183	-1.90941	-1.94604	0.0039	0.103626	no
Uba7	Uba7	Uba7	chr9:107975566-107984056	SUNdKO_Low	WT_Low	OK	0.0442635	0.806365	4.18724	2.93457	0.00165	0.0587639	no
4930447F24Rik	4930447F24Rik	4930447F24Rik	chr9:108096021-108190383	SUNdKO_Low	WT_Low	OK	0.0692684	0.873241	3.65611	2.09222	0.00285	0.0838269	no
Lamb2	Lamb2	Lamb2	chr9:108479861-108490530	SUNdKO_Low	WT_Low	OK	2.72516	5.82789	1.09663	1.74253	0.0024	0.0752722	no
Mir6236	Mir6236	Mir6236	chr9:110281286-110281409	SUNdKO_Low	WT_Low	OK	657.664	2702.99	2.03914	2.07163	0.00185	0.0626774	no
Lars2	Lars2	Lars2	chr9:123366939-123462664	SUNdKO_Low	WT_Low	OK	141.224	514.152	1.86421	2.9617	0.0001	0.00748354	yes
Ntm	Ntm	Ntm	chr9:28995963-29963129	SUNdKO_Low	WT_Low	OK	3.81597	8.86535	1.21613	1.68836	0.0024	0.0752722	no
Adamts15	Adamts15	Adamts15	chr9:30899154-30922452	SUNdKO_Low	WT_Low	OK	0.747182	1.95425	1.38709	1.68202	0.0043	0.109813	no
Vwa5a	Vwa5a	Vwa5a	chr9:38718267-38743337	SUNdKO_Low	WT_Low	OK	2.01235	6.14023	1.60941	2.8086	5e-05	0.00461875	yes
Tmprss4	Tmprss4	Tmprss4	chr9:45172725-45249985	SUNdKO_Low	WT_Low	OK	3.24576	0.76822	-2.07897	-2.03753	0.0014	0.0515688	no
Ankk1	Ankk1	Ankk1	chr9:49415221-49427021	SUNdKO_Low	WT_Low	OK	0.125488	0.677578	2.43284	1.98341	0.00495	0.122702	no
Ncam1	Ncam1	Ncam1	chr9:49502145-49799069	SUNdKO_Low	WT_Low	OK	2.91245	8.34361	1.51844	3.34099	5e-05	0.00461875	yes
Plet1	Plet1	Plet1	chr9:50488798-50505639	SUNdKO_Low	WT_Low	OK	110.075	46.0455	-1.25735	-2.74516	5e-05	0.00461875	yes
Stra6	Stra6	Stra6	chr9:58129087-58153997	SUNdKO_Low	WT_Low	OK	0.0578364	0.670716	3.53565	1.81877	0.0026	0.0786251	no
6030419C18Rik	6030419C18Rik	6030419C18Rik	chr9:58488602-58499742	SUNdKO_Low	WT_Low	OK	0.308835	2.09391	2.76129	2.78167	0.00065	0.0292228	yes
Rplp1	Rplp1	Rplp1	chr9:61913282-61914510	SUNdKO_Low	WT_Low	OK	3598.3	7409.78	1.04212	2.02358	0.0005	0.0244298	yes
Tpm1	Tpm1	Tpm1	chr9:67022592-67049213	SUNdKO_Low	WT_Low	OK	219.675	102.282	-1.10282	-3.34098	5e-05	0.00461875	yes
Col12a1	Col12a1	Col12a1	chr9:79598986-79718722	SUNdKO_Low	WT_Low	OK	1.44285	3.65866	1.3424	2.46778	0.0001	0.00748354	yes
Ctsh	Ctsh	Ctsh	chr9:90054266-90076095	SUNdKO_Low	WT_Low	OK	2.12373	14.5453	2.77588	3.10297	5e-05	0.00461875	yes
Gdpd2	Gdpd2	Gdpd2	chrX:100729846-100738901	SUNdKO_Low	WT_Low	OK	5.73382	13.8663	1.27402	2.30573	0.0002	0.0119434	yes
Taf9b	Taf9b	Taf9b	chrX:106206873-106221158	SUNdKO_Low	WT_Low	OK	6.59774	16.777	1.34644	2.23899	0.00025	0.0140762	yes
Col4a5	Col4a5	Col4a5	chrX:141475418-141689235	SUNdKO_Low	WT_Low	OK	0.0935222	0.920244	3.29864	3.14333	0.00015	0.00985333	yes
Pak3	Pak3	Pak3	chrX:143518590-143797796	SUNdKO_Low	WT_Low	OK	0.904964	2.03023	1.16571	1.92233	0.00165	0.0587639	no
Figf	Figf	Figf	chrX:164373521-164402650	SUNdKO_Low	WT_Low	OK	6.88579	15.6743	1.18671	2.03654	0.0011	0.0436456	yes
Il13ra1	Il13ra1	Il13ra1	chrX:36112107-36171261	SUNdKO_Low	WT_Low	OK	3.20037	6.95304	1.11941	1.84381	0.00135	0.0508357	no
Rbmx	Rbmx	Rbmx	chrX:57383347-57393036	SUNdKO_Low	WT_Low	OK	6.05242	16.6551	1.46038	3.10058	5e-05	0.00461875	yes
Shroom4	Shroom4	Shroom4	chrX:6400144-6633717	SUNdKO_Low	WT_Low	OK	4.25431	1.78079	-1.25641	-1.94824	0.0011	0.0436456	yes
Prrg3	Prrg3	Prrg3	chrX:71962624-71972722	SUNdKO_Low	WT_Low	OK	0.0402948	3.82725	6.56957	5.10922	0.00015	0.00985333	yes
Trex2	Trex2	Trex2	chrX:73433704-73435343	SUNdKO_Low	WT_Low	OK	16.5385	4.69385	-1.81698	-1.78261	0.005	0.123424	no

## Sheet: GO Analysis
Comparison: WT and SundKO MKCs, low calcium (undifferentiated)
Analysis Type:	PANTHER Overrepresentation Test (Released 20200728)
Annotation Version and Release Date:	GO Ontology database DOI: 10.5281/zenodo.4081749 Released 2020-10-09
Analyzed List:	upload_1 (Mus musculus)
Reference List:	Mus musculus (all genes in database)
Test Type:	FISHER
Correction:	FDR
GO biological process complete	Mus musculus - REFLIST (22265)	upload_1 (329)	upload_1 (expected)	upload_1 (over/under)	upload_1 (fold Enrichment)	upload_1 (raw P-value)	upload_1 (FDR)
regulation of Schwann cell migration (GO:1900147)	8	4	0.12	+	33.84	1.99e-05	0.00235
embryonic camera-type eye formation (GO:0060900)	11	4	0.16	+	24.61	5.31e-05	0.00534
regulation of glial cell migration (GO:1903975)	22	6	0.33	+	18.46	2.62e-06	0.000369
keratinization (GO:0031424)	35	8	0.52	+	15.47	1.73e-07	4.07e-05
regulation of natural killer cell differentiation (GO:0032823)	19	4	0.28	+	14.25	0.000314	0.0208
regulation of neuroinflammatory response (GO:0150077)	27	5	0.4	+	12.53	9.26e-05	0.00798
atrioventricular valve morphogenesis (GO:0003181)	24	4	0.35	+	11.28	0.000686	0.0405
neuron projection regeneration (GO:0031102)	25	4	0.37	+	10.83	0.000786	0.0443
regulation of macrophage chemotaxis (GO:0010758)	35	5	0.52	+	9.67	0.000275	0.0189
keratinocyte differentiation (GO:0030216)	85	12	1.26	+	9.55	1.75e-08	5.53e-06
regulation of macrophage migration (GO:1905521)	46	6	0.68	+	8.83	0.000105	0.00881
neuromuscular junction development (GO:0007528)	50	6	0.74	+	8.12	0.00016	0.012
ventricular septum development (GO:0003281)	79	9	1.17	+	7.71	5.49e-06	0.000716
regulation of actin filament-based movement (GO:1903115)	44	5	0.65	+	7.69	0.000716	0.0419
heart valve development (GO:0003170)	57	6	0.84	+	7.12	0.000308	0.0205
positive regulation of chemokine production (GO:0032722)	68	7	1	+	6.97	0.000111	0.009
epidermal cell differentiation (GO:0009913)	148	15	2.19	+	6.86	1.76e-08	5.43e-06
actin cytoskeleton reorganization (GO:0031532)	70	7	1.03	+	6.77	0.000131	0.0105
ventricular cardiac muscle tissue development (GO:0003229)	62	6	0.92	+	6.55	0.000467	0.0291
negative regulation of reproductive process (GO:2000242)	66	6	0.98	+	6.15	0.000635	0.0381
cardiac septum development (GO:0003279)	121	11	1.79	+	6.15	3.82e-06	0.000524
regulation of chemokine production (GO:0032642)	93	8	1.37	+	5.82	0.000116	0.00938
cardiac ventricle development (GO:0003231)	140	12	2.07	+	5.8	2.45e-06	0.000358
response to toxic substance (GO:0009636)	108	9	1.6	+	5.64	5.49e-05	0.00545
negative regulation of neuron projection development (GO:0010977)	161	13	2.38	+	5.46	1.74e-06	0.000266
regulation of multicellular organism growth (GO:0040014)	87	7	1.29	+	5.45	0.000451	0.0285
regulation of receptor signaling pathway via JAK-STAT (GO:0046425)	91	7	1.34	+	5.21	0.00058	0.0354
regulation of cell-matrix adhesion (GO:0001952)	119	9	1.76	+	5.12	0.00011	0.00902
cardiac chamber development (GO:0003205)	187	14	2.76	+	5.07	1.61e-06	0.000251
regulation of cell-substrate adhesion (GO:0010810)	215	16	3.18	+	5.04	3.12e-07	6.74e-05
negative regulation of cell projection organization (GO:0031345)	202	15	2.98	+	5.03	7.51e-07	0.000141
reactive oxygen species metabolic process (GO:0072593)	108	8	1.6	+	5.01	0.000302	0.0204
epidermis development (GO:0008544)	257	19	3.8	+	5	2.66e-08	7.76e-06
regulation of receptor signaling pathway via STAT (GO:1904892)	97	7	1.43	+	4.88	0.000828	0.0462
neural tube closure (GO:0001843)	112	8	1.65	+	4.83	0.00038	0.0247
tube closure (GO:0060606)	113	8	1.67	+	4.79	0.000402	0.0259
regulation of animal organ morphogenesis (GO:2000027)	128	9	1.89	+	4.76	0.000185	0.0134
skin development (GO:0043588)	237	16	3.5	+	4.57	1.05e-06	0.000188
epithelial cell differentiation (GO:0030855)	505	34	7.46	+	4.56	8.11e-13	5.81e-10
primary neural tube formation (GO:0014020)	119	8	1.76	+	4.55	0.000555	0.0344
regulation of gliogenesis (GO:0014013)	119	8	1.76	+	4.55	0.000555	0.0342
developmental growth involved in morphogenesis (GO:0060560)	134	9	1.98	+	4.55	0.000255	0.0177
regulation of leukocyte chemotaxis (GO:0002688)	121	8	1.79	+	4.47	0.000616	0.0372
regulation of interleukin-6 production (GO:0032675)	155	10	2.29	+	4.37	0.000159	0.012
morphogenesis of a branching structure (GO:0001763)	203	13	3	+	4.33	1.83e-05	0.00219
morphogenesis of a branching epithelium (GO:0061138)	193	12	2.85	+	4.21	5.03e-05	0.00509
tube formation (GO:0035148)	177	11	2.62	+	4.21	0.000103	0.00868
positive regulation of angiogenesis (GO:0045766)	168	10	2.48	+	4.03	0.000294	0.02
positive regulation of vasculature development (GO:1904018)	168	10	2.48	+	4.03	0.000294	0.0199
positive regulation of epithelial cell proliferation (GO:0050679)	208	12	3.07	+	3.9	9.89e-05	0.00839
gliogenesis (GO:0042063)	243	14	3.59	+	3.9	2.68e-05	0.00309
morphogenesis of embryonic epithelium (GO:0016331)	179	10	2.65	+	3.78	0.000473	0.0294
actin filament organization (GO:0007015)	253	14	3.74	+	3.74	4.07e-05	0.00434
regulation of leukocyte migration (GO:0002685)	217	12	3.21	+	3.74	0.000144	0.0112
epithelium development (GO:0060429)	1038	56	15.34	+	3.65	1.63e-16	1.29e-12
regulation of chemotaxis (GO:0050920)	224	12	3.31	+	3.63	0.000191	0.0137
positive regulation of cell migration (GO:0030335)	562	30	8.3	+	3.61	3.63e-09	1.33e-06
positive regulation of cellular component movement (GO:0051272)	601	32	8.88	+	3.6	1.13e-09	4.93e-07
positive regulation of cell motility (GO:2000147)	585	31	8.64	+	3.59	2.31e-09	9.13e-07
supramolecular fiber organization (GO:0097435)	492	26	7.27	+	3.58	5.05e-08	1.35e-05
regulation of cell migration (GO:0030334)	934	49	13.8	+	3.55	4.47e-14	4.71e-11
glial cell differentiation (GO:0010001)	191	10	2.82	+	3.54	0.000763	0.0441
extracellular matrix organization (GO:0030198)	268	14	3.96	+	3.54	7.34e-05	0.00677
regulation of angiogenesis (GO:0045765)	288	15	4.26	+	3.52	4.21e-05	0.00446
extracellular structure organization (GO:0043062)	269	14	3.97	+	3.52	7.62e-05	0.00699
positive regulation of locomotion (GO:0040017)	599	31	8.85	+	3.5	3.94e-09	1.38e-06
regulation of cellular component movement (GO:0051270)	1069	55	15.8	+	3.48	2.16e-15	8.54e-12
regulation of locomotion (GO:0040012)	1031	53	15.23	+	3.48	7.8e-15	1.23e-11
regulation of vasculature development (GO:1901342)	292	15	4.31	+	3.48	4.89e-05	0.00498
regulation of epithelial cell proliferation (GO:0050678)	371	19	5.48	+	3.47	5.11e-06	0.000678
regulation of cell motility (GO:2000145)	984	50	14.54	+	3.44	7.63e-14	7.08e-11
kidney development (GO:0001822)	296	15	4.37	+	3.43	5.66e-05	0.00555
positive regulation of cell adhesion (GO:0045785)	435	22	6.43	+	3.42	1.11e-06	0.000193
positive regulation of ERK1 and ERK2 cascade (GO:0070374)	218	11	3.22	+	3.41	0.000566	0.0346
negative regulation of cell migration (GO:0030336)	278	14	4.11	+	3.41	0.000106	0.00882
tube morphogenesis (GO:0035239)	734	36	10.85	+	3.32	8.02e-10	3.72e-07
urogenital system development (GO:0001655)	350	17	5.17	+	3.29	3.05e-05	0.00344
epithelial cell development (GO:0002064)	227	11	3.35	+	3.28	0.000778	0.0442
regulation of cell adhesion (GO:0030155)	724	35	10.7	+	3.27	2.01e-09	8.12e-07
renal system development (GO:0072001)	311	15	4.6	+	3.26	9.6e-05	0.00819
tissue morphogenesis (GO:0048729)	622	30	9.19	+	3.26	3.21e-08	9.2e-06
negative regulation of cell motility (GO:2000146)	291	14	4.3	+	3.26	0.000167	0.0123
regulation of ERK1 and ERK2 cascade (GO:0070372)	312	15	4.61	+	3.25	9.93e-05	0.00838
axon guidance (GO:0007411)	231	11	3.41	+	3.22	0.000891	0.0492
muscle organ development (GO:0007517)	277	13	4.09	+	3.18	0.000357	0.0233
negative regulation of cellular component movement (GO:0051271)	300	14	4.43	+	3.16	0.000226	0.016
actin cytoskeleton organization (GO:0030036)	516	24	7.62	+	3.15	1.48e-06	0.000243
morphogenesis of an epithelium (GO:0002009)	517	24	7.64	+	3.14	1.52e-06	0.000243
negative regulation of locomotion (GO:0040013)	326	15	4.82	+	3.11	0.000157	0.0119
regulation of cellular response to growth factor stimulus (GO:0090287)	283	13	4.18	+	3.11	0.000433	0.0277
tissue development (GO:0009888)	1665	76	24.6	+	3.09	2.07e-18	3.27e-14
positive regulation of cell-cell adhesion (GO:0022409)	264	12	3.9	+	3.08	0.000779	0.0441
axonogenesis (GO:0007409)	352	16	5.2	+	3.08	0.000109	0.00899
actin filament-based process (GO:0030029)	574	26	8.48	+	3.07	8.58e-07	0.000159
cell morphogenesis involved in differentiation (GO:0000904)	575	26	8.5	+	3.06	8.85e-07	0.000162
negative regulation of cell adhesion (GO:0007162)	291	13	4.3	+	3.02	0.000556	0.0342
axon development (GO:0061564)	383	17	5.66	+	3	8.85e-05	0.00767
epithelial tube morphogenesis (GO:0060562)	365	16	5.39	+	2.97	0.000163	0.0121
regulation of cell development (GO:0060284)	572	25	8.45	+	2.96	2.58e-06	0.00037
regulation of actin filament-based process (GO:0032970)	412	18	6.09	+	2.96	6.69e-05	0.00628
positive regulation of response to external stimulus (GO:0032103)	412	18	6.09	+	2.96	6.69e-05	0.00624
regulation of inflammatory response (GO:0050727)	369	16	5.45	+	2.93	0.000183	0.0133
angiogenesis (GO:0001525)	323	14	4.77	+	2.93	0.00046	0.0289
cell morphogenesis (GO:0000902)	743	32	10.98	+	2.91	1.32e-07	3.31e-05
positive regulation of MAPK cascade (GO:0043410)	514	22	7.6	+	2.9	1.42e-05	0.00172
regulation of anatomical structure morphogenesis (GO:0022603)	960	41	14.19	+	2.89	2.46e-09	9.49e-07
cell morphogenesis involved in neuron differentiation (GO:0048667)	446	19	6.59	+	2.88	5.81e-05	0.00563
positive regulation of cell population proliferation (GO:0008284)	991	42	14.64	+	2.87	1.92e-09	7.96e-07
tube development (GO:0035295)	949	40	14.02	+	2.85	5.61e-09	1.92e-06
biological adhesion (GO:0022610)	856	36	12.65	+	2.85	3.66e-08	1.03e-05
negative regulation of cell population proliferation (GO:0008285)	692	29	10.23	+	2.84	8.98e-07	0.000163
animal organ morphogenesis (GO:0009887)	1027	43	15.18	+	2.83	1.71e-09	7.3e-07
regulation of neurogenesis (GO:0050767)	433	18	6.4	+	2.81	0.000122	0.00982
regulation of MAPK cascade (GO:0043408)	699	29	10.33	+	2.81	1.09e-06	0.000191
regulation of growth (GO:0040008)	700	29	10.34	+	2.8	1.12e-06	0.000192
neuron projection morphogenesis (GO:0048812)	483	20	7.14	+	2.8	5.43e-05	0.00543
cell adhesion (GO:0007155)	846	35	12.5	+	2.8	8.41e-08	2.18e-05
negative regulation of cell differentiation (GO:0045596)	678	28	10.02	+	2.79	1.83e-06	0.000278
blood vessel morphogenesis (GO:0048514)	436	18	6.44	+	2.79	0.000132	0.0106
regulation of response to external stimulus (GO:0032101)	902	37	13.33	+	2.78	4.3e-08	1.17e-05
plasma membrane bounded cell projection morphogenesis (GO:0120039)	488	20	7.21	+	2.77	6.22e-05	0.00595
regulation of cell population proliferation (GO:0042127)	1688	69	24.94	+	2.77	2.21e-14	2.68e-11
positive regulation of signal transduction (GO:0009967)	1493	61	22.06	+	2.77	9.94e-13	6.82e-10
neuron projection development (GO:0031175)	711	29	10.51	+	2.76	1.51e-06	0.000243
response to oxidative stress (GO:0006979)	344	14	5.08	+	2.75	0.00083	0.0461
regulation of neuron projection development (GO:0010975)	543	22	8.02	+	2.74	3.16e-05	0.00354
cell projection morphogenesis (GO:0048858)	494	20	7.3	+	2.74	7.31e-05	0.00678
cell junction organization (GO:0034330)	499	20	7.37	+	2.71	8.34e-05	0.00752
gland development (GO:0048732)	429	17	6.34	+	2.68	0.00032	0.0211
regulation of cell projection organization (GO:0031344)	740	29	10.93	+	2.65	3.21e-06	0.000445
positive regulation of intracellular signal transduction (GO:1902533)	947	37	13.99	+	2.64	1.4e-07	3.39e-05
heart development (GO:0007507)	565	22	8.35	+	2.64	5.58e-05	0.0055
neuron development (GO:0048666)	875	34	12.93	+	2.63	5.25e-07	0.000104
muscle structure development (GO:0061061)	490	19	7.24	+	2.62	0.000188	0.0136
regulation of plasma membrane bounded cell projection organization (GO:0120035)	724	28	10.7	+	2.62	6.06e-06	0.000771
cell part morphogenesis (GO:0032990)	520	20	7.68	+	2.6	0.000142	0.0111
generation of neurons (GO:0048699)	1358	52	20.07	+	2.59	5.71e-10	2.73e-07
anatomical structure formation involved in morphogenesis (GO:0048646)	944	36	13.95	+	2.58	3.66e-07	7.69e-05
embryonic organ development (GO:0048568)	499	19	7.37	+	2.58	0.000235	0.0165
negative regulation of developmental process (GO:0051093)	946	36	13.98	+	2.58	3.84e-07	7.97e-05
circulatory system development (GO:0072359)	922	35	13.62	+	2.57	5.96e-07	0.000116
regulation of defense response (GO:0031347)	581	22	8.59	+	2.56	8.25e-05	0.00749
cellular component morphogenesis (GO:0032989)	608	23	8.98	+	2.56	5.78e-05	0.00563
positive regulation of cell death (GO:0010942)	662	25	9.78	+	2.56	2.82e-05	0.00321
neurogenesis (GO:0022008)	1490	56	22.02	+	2.54	2.8e-10	1.38e-07
circulatory system process (GO:0003013)	455	17	6.72	+	2.53	0.000608	0.0369
anatomical structure morphogenesis (GO:0009653)	2255	84	33.32	+	2.52	2.83e-15	7.44e-12
growth (GO:0040007)	458	17	6.77	+	2.51	0.000652	0.039
blood vessel development (GO:0001568)	539	20	7.96	+	2.51	0.000224	0.016
positive regulation of multicellular organismal process (GO:0051240)	1564	58	23.11	+	2.51	1.79e-10	9.41e-08
positive regulation of cell communication (GO:0010647)	1699	63	25.11	+	2.51	2.4e-11	1.35e-08
positive regulation of protein phosphorylation (GO:0001934)	1001	37	14.79	+	2.5	6.86e-07	0.000132
regulation of cell differentiation (GO:0045595)	1570	58	23.2	+	2.5	2.02e-10	1.03e-07
positive regulation of signaling (GO:0023056)	1706	63	25.21	+	2.5	2.78e-11	1.51e-08
vasculature development (GO:0001944)	569	21	8.41	+	2.5	0.000168	0.0123
embryonic morphogenesis (GO:0048598)	626	23	9.25	+	2.49	8.81e-05	0.00768
small molecule biosynthetic process (GO:0044283)	463	17	6.84	+	2.48	0.000732	0.0426
cell population proliferation (GO:0008283)	548	20	8.1	+	2.47	0.000275	0.0188
regulation of multicellular organismal development (GO:2000026)	1435	52	21.2	+	2.45	3.72e-09	1.33e-06
neuron differentiation (GO:0030182)	1078	39	15.93	+	2.45	4.68e-07	9.34e-05
regulation of cellular response to stress (GO:0080135)	636	23	9.4	+	2.45	0.000165	0.0122
positive regulation of developmental process (GO:0051094)	1411	51	20.85	+	2.45	5.83e-09	1.96e-06
positive regulation of cell differentiation (GO:0045597)	921	33	13.61	+	2.42	4.82e-06	0.00065
regulation of nervous system development (GO:0051960)	531	19	7.85	+	2.42	0.000775	0.0446
regulation of cytoskeleton organization (GO:0051493)	531	19	7.85	+	2.42	0.000775	0.0445
response to cytokine (GO:0034097)	761	27	11.24	+	2.4	4.61e-05	0.00479
positive regulation of phosphorylation (GO:0042327)	1075	38	15.88	+	2.39	1.08e-06	0.000191
regulation of system process (GO:0044057)	600	21	8.87	+	2.37	0.000431	0.0276
cellular response to cytokine stimulus (GO:0071345)	662	23	9.78	+	2.35	0.000231	0.0163
negative regulation of cellular component organization (GO:0051129)	727	25	10.74	+	2.33	0.000133	0.0105
cytoskeleton organization (GO:0007010)	1106	38	16.34	+	2.33	2.6e-06	0.000369
negative regulation of cell death (GO:0060548)	1053	36	15.56	+	2.31	5.56e-06	0.000719
positive regulation of phosphorus metabolic process (GO:0010562)	1145	39	16.92	+	2.31	2.1e-06	0.000313
positive regulation of phosphate metabolic process (GO:0045937)	1145	39	16.92	+	2.31	2.1e-06	0.00031
regulation of developmental process (GO:0050793)	2503	85	36.99	+	2.3	3.17e-13	2.5e-10
positive regulation of programmed cell death (GO:0043068)	592	20	8.75	+	2.29	0.000816	0.0457
negative regulation of molecular function (GO:0044092)	1040	35	15.37	+	2.28	9.66e-06	0.00121
regulation of protein phosphorylation (GO:0001932)	1439	48	21.26	+	2.26	2.24e-07	5.05e-05
positive regulation of protein modification process (GO:0031401)	1233	41	18.22	+	2.25	2.64e-06	0.000368
locomotion (GO:0040011)	1217	40	17.98	+	2.22	4.2e-06	0.000571
regulation of localization (GO:0032879)	2852	93	42.14	+	2.21	1.62e-13	1.34e-10
nervous system development (GO:0007399)	2087	68	30.84	+	2.21	9.62e-10	4.34e-07
regulation of cellular component biogenesis (GO:0044087)	962	31	14.22	+	2.18	6.47e-05	0.00611
regulation of intracellular signal transduction (GO:1902531)	1583	51	23.39	+	2.18	2.47e-07	5.48e-05
regulation of response to stress (GO:0080134)	1247	40	18.43	+	2.17	6.04e-06	0.000775
cell migration (GO:0016477)	874	28	12.91	+	2.17	0.00017	0.0124
regulation of multicellular organismal process (GO:0051239)	2779	89	41.06	+	2.17	2.11e-12	1.39e-09
movement of cell or subcellular component (GO:0006928)	1439	46	21.26	+	2.16	1.44e-06	0.000239
regulation of secretion (GO:0051046)	785	25	11.6	+	2.16	0.000443	0.028
regulation of hydrolase activity (GO:0051336)	1010	32	14.92	+	2.14	8.45e-05	0.00754
negative regulation of apoptotic process (GO:0043066)	916	29	13.54	+	2.14	0.000224	0.0159
negative regulation of cellular protein metabolic process (GO:0032269)	1012	32	14.95	+	2.14	8.62e-05	0.0076
regulation of cell death (GO:0010941)	1649	52	24.37	+	2.13	4.18e-07	8.46e-05
regulation of signal transduction (GO:0009966)	2791	88	41.24	+	2.13	8.35e-12	5.07e-09
negative regulation of transcription by RNA polymerase II (GO:0000122)	893	28	13.2	+	2.12	0.000328	0.0216
animal organ development (GO:0048513)	3123	97	46.15	+	2.1	7.73e-13	5.81e-10
negative regulation of protein metabolic process (GO:0051248)	1063	33	15.71	+	2.1	7.95e-05	0.00725
regulation of phosphorylation (GO:0042325)	1579	49	23.33	+	2.1	1.38e-06	0.000232
negative regulation of programmed cell death (GO:0043069)	936	29	13.83	+	2.1	0.000263	0.0181
regulation of protein modification process (GO:0031399)	1809	56	26.73	+	2.09	2.54e-07	5.57e-05
plasma membrane bounded cell projection organization (GO:0120036)	1099	34	16.24	+	2.09	6.31e-05	0.006
embryo development (GO:0009790)	1196	37	17.67	+	2.09	3.76e-05	0.00406
cell differentiation (GO:0030154)	3536	109	52.25	+	2.09	1.94e-14	2.55e-11
cellular developmental process (GO:0048869)	3588	110	53.02	+	2.07	2.47e-14	2.78e-11
cell development (GO:0048468)	1794	55	26.51	+	2.07	4.02e-07	8.23e-05
cell projection organization (GO:0030030)	1155	35	17.07	+	2.05	8.53e-05	0.00757
positive regulation of response to stimulus (GO:0048584)	2253	68	33.29	+	2.04	2.13e-08	6.34e-06
system development (GO:0048731)	4153	125	61.37	+	2.04	4.14e-16	2.18e-12
regulation of cell communication (GO:0010646)	3197	96	47.24	+	2.03	7.93e-12	5.01e-09
central nervous system development (GO:0007417)	868	26	12.83	+	2.03	0.000853	0.0472
positive regulation of cellular protein metabolic process (GO:0032270)	1571	47	23.21	+	2.02	6.78e-06	0.000856
regulation of signaling (GO:0023051)	3209	96	47.42	+	2.02	8.96e-12	5.24e-09
regulation of phosphate metabolic process (GO:0019220)	1741	52	25.73	+	2.02	1.6e-06	0.000253
regulation of phosphorus metabolic process (GO:0051174)	1742	52	25.74	+	2.02	1.62e-06	0.000251
cellular response to organic substance (GO:0071310)	1811	54	26.76	+	2.02	1.34e-06	0.000228
response to oxygen-containing compound (GO:1901700)	1308	39	19.33	+	2.02	4.84e-05	0.00496
cellular response to oxygen-containing compound (GO:1901701)	912	27	13.48	+	2	0.000736	0.0427
regulation of cellular protein metabolic process (GO:0032268)	2548	75	37.65	+	1.99	9.26e-09	2.98e-06
regulation of apoptotic process (GO:0042981)	1463	43	21.62	+	1.99	2.74e-05	0.00314
negative regulation of transcription, DNA-templated (GO:0045892)	1235	36	18.25	+	1.97	0.000145	0.0112
negative regulation of nucleic acid-templated transcription (GO:1903507)	1239	36	18.31	+	1.97	0.00015	0.0115
negative regulation of RNA biosynthetic process (GO:1902679)	1240	36	18.32	+	1.96	0.000152	0.0115
regulation of programmed cell death (GO:0043067)	1488	43	21.99	+	1.96	3.38e-05	0.00372
localization of cell (GO:0051674)	1008	29	14.89	+	1.95	0.000776	0.0444
cell motility (GO:0048870)	1008	29	14.89	+	1.95	0.000776	0.0442
negative regulation of multicellular organismal process (GO:0051241)	1078	31	15.93	+	1.95	0.000677	0.0402
cellular response to chemical stimulus (GO:0070887)	2374	68	35.08	+	1.94	1.37e-07	3.37e-05
positive regulation of protein metabolic process (GO:0051247)	1648	47	24.35	+	1.93	1.92e-05	0.00227
negative regulation of response to stimulus (GO:0048585)	1583	45	23.39	+	1.92	3.44e-05	0.00376
multicellular organism development (GO:0007275)	4769	135	70.47	+	1.92	2.34e-15	7.39e-12
regulation of protein metabolic process (GO:0051246)	2703	76	39.94	+	1.9	4.01e-08	1.11e-05
negative regulation of cell communication (GO:0010648)	1317	37	19.46	+	1.9	0.000235	0.0164
negative regulation of signaling (GO:0023057)	1321	37	19.52	+	1.9	0.000243	0.0169
regulation of transport (GO:0051049)	1896	53	28.02	+	1.89	1e-05	0.00124
negative regulation of cellular process (GO:0048523)	4789	133	70.76	+	1.88	1.61e-14	2.31e-11
negative regulation of signal transduction (GO:0009968)	1197	33	17.69	+	1.87	0.0008	0.0449
positive regulation of molecular function (GO:0044093)	1491	41	22.03	+	1.86	0.00015	0.0115
anatomical structure development (GO:0048856)	5143	141	76	+	1.86	4.67e-15	8.19e-12
response to organic substance (GO:0010033)	2525	69	37.31	+	1.85	7.47e-07	0.000142
response to chemical (GO:0042221)	3465	94	51.2	+	1.84	2.78e-09	1.04e-06
regulation of immune system process (GO:0002682)	1488	40	21.99	+	1.82	0.000338	0.0222
negative regulation of RNA metabolic process (GO:0051253)	1340	36	19.8	+	1.82	0.00066	0.0393
regulation of molecular function (GO:0065009)	2579	69	38.11	+	1.81	1.5e-06	0.000244
negative regulation of biological process (GO:0048519)	5240	140	77.43	+	1.81	6.07e-14	5.99e-11
response to external stimulus (GO:0009605)	2360	63	34.87	+	1.81	5.48e-06	0.00072
positive regulation of cellular process (GO:0048522)	5677	151	83.89	+	1.8	2.86e-15	6.44e-12
negative regulation of cellular macromolecule biosynthetic process (GO:2000113)	1430	38	21.13	+	1.8	0.000621	0.0374
regulation of catalytic activity (GO:0050790)	1883	50	27.82	+	1.8	6.17e-05	0.00594
negative regulation of cellular biosynthetic process (GO:0031327)	1507	40	22.27	+	1.8	0.000385	0.0249
negative regulation of biosynthetic process (GO:0009890)	1548	41	22.87	+	1.79	0.000434	0.0276
negative regulation of macromolecule biosynthetic process (GO:0010558)	1448	38	21.4	+	1.78	0.000695	0.0409
negative regulation of nucleobase-containing compound metabolic process (GO:0045934)	1448	38	21.4	+	1.78	0.000695	0.0408
developmental process (GO:0032502)	5533	144	81.76	+	1.76	1.22e-13	1.07e-10
regulation of cellular component organization (GO:0051128)	2424	63	35.82	+	1.76	1.12e-05	0.00138
negative regulation of gene expression (GO:0010629)	1888	49	27.9	+	1.76	0.000141	0.0111
regulation of response to stimulus (GO:0048583)	3894	101	57.54	+	1.76	6.06e-09	1.99e-06
negative regulation of nitrogen compound metabolic process (GO:0051172)	2323	60	34.33	+	1.75	2.6e-05	0.00302
positive regulation of biological process (GO:0048518)	6157	159	90.98	+	1.75	3.39e-15	6.69e-12
response to stress (GO:0006950)	3220	83	47.58	+	1.74	3.63e-07	7.73e-05
positive regulation of gene expression (GO:0010628)	2257	58	33.35	+	1.74	4.62e-05	0.00477
negative regulation of cellular metabolic process (GO:0031324)	2525	63	37.31	+	1.69	3.69e-05	0.00402
positive regulation of nitrogen compound metabolic process (GO:0051173)	3052	75	45.1	+	1.66	1.16e-05	0.00142
positive regulation of macromolecule metabolic process (GO:0010604)	3419	83	50.52	+	1.64	4.88e-06	0.000652
negative regulation of macromolecule metabolic process (GO:0010605)	2694	65	39.81	+	1.63	8.39e-05	0.00752
negative regulation of metabolic process (GO:0009892)	2947	71	43.55	+	1.63	3.84e-05	0.00413
positive regulation of metabolic process (GO:0009893)	3711	89	54.84	+	1.62	2.46e-06	0.000356
positive regulation of cellular metabolic process (GO:0031325)	3261	78	48.19	+	1.62	1.48e-05	0.00179
regulation of biological quality (GO:0065008)	3919	86	57.91	+	1.49	0.000143	0.0111
regulation of gene expression (GO:0010468)	4565	97	67.45	+	1.44	0.000148	0.0114
regulation of cellular metabolic process (GO:0031323)	5912	122	87.36	+	1.4	3.22e-05	0.00358
regulation of nitrogen compound metabolic process (GO:0051171)	5545	114	81.94	+	1.39	8.75e-05	0.00767
multicellular organismal process (GO:0032501)	7309	150	108	+	1.39	2.02e-06	0.000304
regulation of macromolecule metabolic process (GO:0060255)	6103	123	90.18	+	1.36	0.000109	0.00898
regulation of metabolic process (GO:0019222)	6570	132	97.08	+	1.36	4.41e-05	0.00461
regulation of primary metabolic process (GO:0080090)	5707	113	84.33	+	1.34	0.000467	0.0292
response to stimulus (GO:0050896)	8442	160	124.74	+	1.28	9.54e-05	0.00818
regulation of cellular process (GO:0050794)	11483	217	169.68	+	1.28	1.99e-07	4.55e-05
regulation of biological process (GO:0050789)	11986	226	177.11	+	1.28	5.44e-08	1.43e-05
biological regulation (GO:0065007)	12595	233	186.11	+	1.25	1.55e-07	3.71e-05
cellular process (GO:0009987)	15097	266	223.08	+	1.19	1.84e-07	4.28e-05
biological_process (GO:0008150)	20583	320	304.15	+	1.05	0.000302	0.0202
Unclassified (UNCLASSIFIED)	1682	9	24.85	-	0.36	0.000302	0.0203
G protein-coupled receptor signaling pathway (GO:0007186)	1831	8	27.06	-	0.3	2.41e-05	0.00282
sensory perception (GO:0007600)	1647	7	24.34	-	0.29	4.27e-05	0.00449
sensory perception of smell (GO:0007608)	1126	0	16.64	-	< 0.01	1.1e-07	2.81e-05
sensory perception of chemical stimulus (GO:0007606)	1226	0	18.12	-	< 0.01	2.04e-08	6.19e-06
