# Supplementary material for: The LINC complex transmits integrin-dependent tension to the nuclear lamina and represses epidermal differentiation
Source: bioRxiv preprint, doi:10.1101/2020.05.03.075085, version 2 (2020-12-30)
Supplement: Supplementary File 3 [file 075085_file05.xlsx]

## Sheet: qc
Table 3	Quality control statistics for ATAC-seq, Carley et al.
general									replication																							peak_stat
								seq_endedness	reproducibility																						num_peaks	peak_region_size
									overlap											idr												idr_opt						overlap_opt

replicate	title	description	pipeline_ver	pipeline_type	genome	aligner	peak_caller	paired_end	Nt	N1	N2	Np	N_opt	N_consv	opt_set	consv_set	rescue_ratio	self_consistency_ratio	reproducibility	Nt	N1	N2	Np	N_opt	N_consv	opt_set	consv_set	rescue_ratio	self_consistency_ratio	reproducibility	num_peaks	min_size	25_pct	50_pct	75_pct	max_size	mean	min_size	25_pct	50_pct	75_pct	max_size	mean	min_size	25_pct	50_pct	75_pct	max_size	mean
rep1	WT MKCs undifferentiated (low calcium)	ATAC-seq on WT MKC no Ca (p11 and p12) (paired end,mm10)	v1.8.0	atac	mm10	bowtie2	macs2	TRUE	61502	36250	42579	60660	61502	61502	rep1_vs_rep2	rep1_vs_rep2	1.01388	1.17459	pass	27175	13620	19773	26381	27175	27175	rep1_vs_rep2	rep1_vs_rep2	1.0301	1.45176	pass	155266	150	593	806	1067	2472	850.067	150	362	562	843	2472	641.108	150	151	212	319	1936	286.452
rep2								TRUE																							150481													150	183	254	392	2265	346.332
rep1	WT MKCs undifferentiated (low calcium)	ATAC-seq on SUN dKO MKC no Ca (p11 and p12) (paired end,mm10)	v1.8.0	atac	mm10	bowtie2	macs2	TRUE	122308	74022	95443	136840	136840	122308	pooled-pr1_vs_pooled-pr2	rep1_vs_rep2	1.11881	1.28939	pass	33415	30844	19123	39345	39345	33415	pooled-pr1_vs_pooled-pr2	rep1_vs_rep2	1.17747	1.61293	pass	207342	150	617	885	1198	3253	938.245	150	363	548	843	3253	652.07	150	181	253	420	3278	360.31
rep2								TRUE																							284518													150	175	233	370	3040	326.932
[truncated: 99 more columns]
